# Supplementary material for: Multiplex-Heterogeneous Network-Based Capturing Potential SNP “Switches” of Pathways Associating With Diverse Disease Characteristics of Asthma
Source: Front Cell Dev Biol. 2021 Dec 14;9:744932. doi: 10.3389/fcell.2021.744932 (PMC8712737; doi:10.3389/fcell.2021.744932)
Supplement: Supplementary file 2 [file Table3.XLSX]

## Sheet: Sheet1
inflammation										remodeling									hyperresponsiveness
source	term_name	term_id	adjusted_p_value	negative_log10_of_adjusted_p_value	term_size	query_size	intersection_size			source	term_name	term_id	adjusted_p_value	negative_log10_of_adjusted_p_value	term_size	query_size	intersection_size		source	term_name	term_id	adjusted_p_value	negative_log10_of_adjusted_p_value	term_size	query_size	intersection_size
KEGG	Cytokine-cytokine receptor interaction	KEGG:04060	1.76546e-45	44.7531	293	242	72			KEGG	Pathways in cancer	KEGG:05200	1.30767e-37	36.8835	529	188	74		KEGG	Th17 cell differentiation	KEGG:04659	2.23888e-21	20.65	104	86	22
KEGG	Th17 cell differentiation	KEGG:04659	7.46061e-37	36.1272	104	242	43			KEGG	IL-17 signaling pathway	KEGG:04657	8.49834e-28	27.0707	92	188	32		KEGG	Pathways in cancer	KEGG:05200	9.25433e-17	16.0337	529	86	34
KEGG	Pathways in cancer	KEGG:05200	2.06876e-33	32.6843	529	242	79			KEGG	Hepatitis B	KEGG:05161	2.31969e-27	26.6346	162	188	39		KEGG	Inflammatory bowel disease	KEGG:05321	4.23242e-15	14.3734	62	86	15
KEGG	Inflammatory bowel disease	KEGG:05321	1.56938e-32	31.8043	62	242	33			KEGG	Human cytomegalovirus infection	KEGG:05163	3.27638e-27	26.4846	223	188	44		KEGG	IL-17 signaling pathway	KEGG:04657	1.00543e-13	12.9976	92	86	16
KEGG	Chemokine signaling pathway	KEGG:04062	8.53079e-30	29.069	190	242	48			KEGG	AGE-RAGE signaling pathway in diabetic complications	KEGG:04933	1.83337e-26	25.7367	100	188	32		KEGG	Yersinia infection	KEGG:05135	2.12e-13	12.6737	136	86	18
KEGG	Viral protein interaction with cytokine and cytokine receptor	KEGG:04061	5.06387e-27	26.2955	98	242	35			KEGG	Kaposi sarcoma-associated herpesvirus infection	KEGG:05167	2.12472e-25	24.6727	193	188	40		KEGG	Hepatitis B	KEGG:05161	3.20595e-13	12.494	162	86	19
KEGG	JAK-STAT signaling pathway	KEGG:04630	2.61253e-26	25.5829	162	242	42			KEGG	Prostate cancer	KEGG:05215	3.28252e-24	23.4838	97	188	30		KEGG	Th1 and Th2 cell differentiation	KEGG:04658	1.38308e-12	11.8592	89	86	15
KEGG	IL-17 signaling pathway	KEGG:04657	1.8181e-25	24.7404	92	242	33			KEGG	Chagas disease	KEGG:05142	1.27582e-23	22.8942	101	188	30		KEGG	Cytokine-cytokine receptor interaction	KEGG:04060	1.91165e-12	11.7186	293	86	23
KEGG	AGE-RAGE signaling pathway in diabetic complications	KEGG:04933	2.25062e-25	24.6477	100	242	34			KEGG	PI3K-Akt signaling pathway	KEGG:04151	2.92964e-23	22.5332	353	188	49		KEGG	Lipid and atherosclerosis	KEGG:05417	4.60744e-12	11.3365	214	86	20
KEGG	Lipid and atherosclerosis	KEGG:05417	4.05837e-22	21.3916	214	242	43			KEGG	Lipid and atherosclerosis	KEGG:05417	1.66057e-22	21.7797	214	188	39		KEGG	JAK-STAT signaling pathway	KEGG:04630	4.85805e-12	11.3135	162	86	18
KEGG	Toll-like receptor signaling pathway	KEGG:04620	2.50548e-21	20.6011	102	242	31			KEGG	Inflammatory bowel disease	KEGG:05321	7.98631e-22	21.0977	62	188	24		KEGG	Leishmaniasis	KEGG:05140	3.50716e-11	10.455	72	86	13
KEGG	Hepatitis B	KEGG:05161	7.25568e-21	20.1393	162	242	37			KEGG	Yersinia infection	KEGG:05135	8.62808e-22	21.0641	136	188	32		KEGG	Human cytomegalovirus infection	KEGG:05163	1.15211e-10	9.9385	223	86	19
KEGG	Chagas disease	KEGG:05142	2.84398e-20	19.5461	101	242	30			KEGG	Toll-like receptor signaling pathway	KEGG:04620	6.75907e-21	20.1701	102	188	28		KEGG	Toxoplasmosis	KEGG:05145	5.35968e-10	9.27086	109	86	14
KEGG	C-type lectin receptor signaling pathway	KEGG:04625	7.3842e-20	19.1317	104	242	30			KEGG	Pancreatic cancer	KEGG:05212	1.02754e-20	19.9882	76	188	25		KEGG	Chemokine signaling pathway	KEGG:04062	9.28168e-10	9.03237	190	86	17
KEGG	Th1 and Th2 cell differentiation	KEGG:04658	1.30166e-19	18.8855	89	242	28			KEGG	Th17 cell differentiation	KEGG:04659	1.22113e-20	19.9132	104	188	28		KEGG	Pathogenic Escherichia coli infection	KEGG:05130	1.53306e-09	8.81444	196	86	17
KEGG	PD-L1 expression and PD-1 checkpoint pathway in cancer	KEGG:05235	2.11201e-18	17.6753	89	242	27			KEGG	EGFR tyrosine kinase inhibitor resistance	KEGG:01521	3.08572e-20	19.5106	79	188	25		KEGG	Influenza A	KEGG:05164	1.70235e-09	8.76895	169	86	16
KEGG	Yersinia infection	KEGG:05135	2.7711e-18	17.5573	136	242	32			KEGG	TNF signaling pathway	KEGG:04668	1.13749e-19	18.9441	112	188	28		KEGG	Coronavirus disease - COVID-19	KEGG:05171	2.08899e-08	7.68006	231	86	17
KEGG	Kaposi sarcoma-associated herpesvirus infection	KEGG:05167	4.58402e-18	17.3388	193	242	37			KEGG	JAK-STAT signaling pathway	KEGG:04630	2.78851e-19	18.5546	162	188	32		KEGG	Tuberculosis	KEGG:05152	3.19519e-08	7.4955	175	86	15
KEGG	Human cytomegalovirus infection	KEGG:05163	1.25694e-17	16.9007	223	242	39			KEGG	PD-L1 expression and PD-1 checkpoint pathway in cancer	KEGG:05235	8.48504e-19	18.0713	89	188	25		KEGG	AGE-RAGE signaling pathway in diabetic complications	KEGG:04933	4.35075e-08	7.36144	100	86	12
KEGG	Osteoclast differentiation	KEGG:04380	2.48898e-17	16.604	125	242	30			KEGG	Cytokine-cytokine receptor interaction	KEGG:04060	2.77573e-18	17.5566	293	188	40		KEGG	Chagas disease	KEGG:05142	4.89492e-08	7.31025	101	86	12
KEGG	Tuberculosis	KEGG:05152	1.10976e-16	15.9548	175	242	34			KEGG	Proteoglycans in cancer	KEGG:05205	5.08533e-18	17.2937	205	188	34		KEGG	C-type lectin receptor signaling pathway	KEGG:04625	6.9166e-08	7.16011	104	86	12
KEGG	T cell receptor signaling pathway	KEGG:04660	1.45915e-16	15.8359	103	242	27			KEGG	Colorectal cancer	KEGG:05210	6.3193e-18	17.1993	86	188	24		KEGG	Necroptosis	KEGG:04217	9.16575e-08	7.03783	159	86	14
KEGG	Influenza A	KEGG:05164	3.18454e-16	15.497	169	242	33			KEGG	FoxO signaling pathway	KEGG:04068	1.12238e-17	16.9499	131	188	28		KEGG	Kaposi sarcoma-associated herpesvirus infection	KEGG:05167	1.26357e-07	6.8984	193	86	15
KEGG	TNF signaling pathway	KEGG:04668	1.53367e-15	14.8143	112	242	27			KEGG	Bladder cancer	KEGG:05219	2.60007e-17	16.585	41	188	18		KEGG	Malaria	KEGG:05144	1.48907e-07	6.82709	49	86	9
KEGG	Human T-cell leukemia virus 1 infection	KEGG:05166	1.88392e-15	14.7249	216	242	36			KEGG	Chronic myeloid leukemia	KEGG:05220	1.00055e-16	15.9998	76	188	22		KEGG	Rheumatoid arthritis	KEGG:05323	1.54661e-07	6.81062	88	86	11
KEGG	Leishmaniasis	KEGG:05140	6.94405e-15	14.1584	72	242	22			KEGG	Hepatitis C	KEGG:05160	1.70488e-16	15.7683	157	188	29		KEGG	NOD-like receptor signaling pathway	KEGG:04621	3.75075e-07	6.42588	177	86	14
KEGG	Coronavirus disease - COVID-19	KEGG:05171	1.76875e-14	13.7523	231	242	36			KEGG	Human papillomavirus infection	KEGG:05165	2.48595e-16	15.6045	331	188	40		KEGG	Viral protein interaction with cytokine and cytokine receptor	KEGG:04061	4.96421e-07	6.30415	98	86	11
KEGG	Fc epsilon RI signaling pathway	KEGG:04664	2.01572e-14	13.6956	67	242	21			KEGG	Human T-cell leukemia virus 1 infection	KEGG:05166	2.61216e-16	15.583	216	188	33		KEGG	Pertussis	KEGG:05133	5.3213e-07	6.27398	76	86	10
KEGG	Toxoplasmosis	KEGG:05145	9.20037e-14	13.0362	109	242	25			KEGG	Chemokine signaling pathway	KEGG:04062	4.37977e-16	15.3585	190	188	31		KEGG	Osteoclast differentiation	KEGG:04380	5.87872e-07	6.23072	125	86	12
KEGG	Pertussis	KEGG:05133	3.54606e-13	12.4503	76	242	21			KEGG	Osteoclast differentiation	KEGG:04380	5.18248e-16	15.2855	125	188	26		KEGG	Amoebiasis	KEGG:05146	6.86088e-07	6.16362	101	86	11
KEGG	EGFR tyrosine kinase inhibitor resistance	KEGG:01521	8.38377e-13	12.0766	79	242	21			KEGG	ErbB signaling pathway	KEGG:04012	1.09761e-15	14.9596	84	188	22		KEGG	Toll-like receptor signaling pathway	KEGG:04620	7.62374e-07	6.11783	102	86	11
KEGG	PI3K-Akt signaling pathway	KEGG:04151	8.81222e-13	12.0549	353	242	42			KEGG	Endocrine resistance	KEGG:01522	1.30693e-15	14.8837	95	188	23		KEGG	T cell receptor signaling pathway	KEGG:04660	8.46148e-07	6.07255	103	86	11
KEGG	Proteoglycans in cancer	KEGG:05205	9.3946e-13	12.0271	205	242	32			KEGG	MAPK signaling pathway	KEGG:04010	1.44714e-15	14.8395	294	188	37		KEGG	PD-L1 expression and PD-1 checkpoint pathway in cancer	KEGG:05235	2.53137e-06	5.59665	89	86	10
KEGG	NF-kappa B signaling pathway	KEGG:04064	2.05062e-12	11.6881	102	242	23			KEGG	Toxoplasmosis	KEGG:05145	2.65199e-15	14.5764	109	188	24		KEGG	PI3K-Akt signaling pathway	KEGG:04151	1.25172e-05	4.90249	353	86	17
KEGG	Malaria	KEGG:05144	2.37911e-12	11.6236	49	242	17			KEGG	HIF-1 signaling pathway	KEGG:04066	2.65199e-15	14.5764	109	188	24		KEGG	Measles	KEGG:05162	1.93821e-05	4.7126	139	86	11
KEGG	Measles	KEGG:05162	4.42723e-12	11.3539	139	242	26			KEGG	Fluid shear stress and atherosclerosis	KEGG:05418	6.94449e-15	14.1584	138	188	26		KEGG	Proteoglycans in cancer	KEGG:05205	1.93853e-05	4.71253	205	86	13
KEGG	Growth hormone synthesis, secretion and action	KEGG:04935	7.71825e-12	11.1125	119	242	24			KEGG	Influenza A	KEGG:05164	1.39052e-14	13.8568	169	188	28		KEGG	Shigellosis	KEGG:05131	2.4215e-05	4.61592	246	86	14
KEGG	Fluid shear stress and atherosclerosis	KEGG:05418	3.01747e-11	10.5204	138	242	25			KEGG	Cellular senescence	KEGG:04218	1.61377e-14	13.7922	156	188	27		KEGG	Asthma	KEGG:05310	2.62851e-05	4.58029	27	86	6
KEGG	Rheumatoid arthritis	KEGG:05323	9.47006e-11	10.0236	88	242	20			KEGG	NF-kappa B signaling pathway	KEGG:04064	9.73011e-14	13.0119	102	188	22		KEGG	Leukocyte transendothelial migration	KEGG:04670	2.7248e-05	4.56466	114	86	10
KEGG	Epstein-Barr virus infection	KEGG:05169	9.94464e-11	10.0024	198	242	29			KEGG	Leishmaniasis	KEGG:05140	1.7534e-13	12.7561	72	188	19		KEGG	Intestinal immune network for IgA production	KEGG:04672	3.47408e-05	4.45916	45	86	7
KEGG	Shigellosis	KEGG:05131	1.70104e-10	9.76929	246	242	32			KEGG	Melanoma	KEGG:05218	1.7534e-13	12.7561	72	188	19		KEGG	Human T-cell leukemia virus 1 infection	KEGG:05166	3.54873e-05	4.44993	216	86	13
KEGG	Pancreatic cancer	KEGG:05212	6.41369e-10	9.19289	76	242	18			KEGG	Glioma	KEGG:05214	4.01775e-13	12.396	75	188	19		KEGG	Sphingolipid signaling pathway	KEGG:04071	4.07799e-05	4.38955	119	86	10
KEGG	Acute myeloid leukemia	KEGG:05221	7.58925e-10	9.1198	67	242	17			KEGG	Gastric cancer	KEGG:05226	4.2141e-13	12.3753	148	188	25		KEGG	Fc epsilon RI signaling pathway	KEGG:04664	4.10493e-05	4.38669	67	86	8
KEGG	HIF-1 signaling pathway	KEGG:04066	7.64891e-10	9.1164	109	242	21			KEGG	Acute myeloid leukemia	KEGG:05221	7.08341e-13	12.1498	67	188	18		KEGG	Platelet activation	KEGG:04611	5.98755e-05	4.22275	124	86	10
KEGG	Thyroid hormone signaling pathway	KEGG:04919	8.02221e-10	9.09571	121	242	22			KEGG	Shigellosis	KEGG:05131	8.11196e-13	12.0909	246	188	31		KEGG	Adherens junction	KEGG:04520	6.46656e-05	4.18933	71	86	8
KEGG	Inflammatory mediator regulation of TRP channels	KEGG:04750	8.05019e-10	9.09419	98	242	20			KEGG	Epstein-Barr virus infection	KEGG:05169	9.48941e-13	12.0228	198	188	28		KEGG	Hepatitis C	KEGG:05160	6.63454e-05	4.17819	157	86	11
KEGG	NOD-like receptor signaling pathway	KEGG:04621	1.51164e-09	8.82055	177	242	26			KEGG	Coronavirus disease - COVID-19	KEGG:05171	1.01338e-12	11.9942	231	188	30		KEGG	Epstein-Barr virus infection	KEGG:05169	9.56473e-05	4.01933	198	86	12
KEGG	Prolactin signaling pathway	KEGG:04917	1.63533e-09	8.7864	70	242	17			KEGG	Focal adhesion	KEGG:04510	1.23402e-12	11.9087	200	188	28		KEGG	Focal adhesion	KEGG:04510	0.000106418	3.97298	200	86	12
KEGG	Neurotrophin signaling pathway	KEGG:04722	4.43851e-09	8.35276	119	242	21			KEGG	T cell receptor signaling pathway	KEGG:04660	1.51388e-12	11.8199	103	188	21		KEGG	Allograft rejection	KEGG:05330	0.000112448	3.94905	34	86	6
KEGG	Phospholipase D signaling pathway	KEGG:04072	6.53757e-09	8.18458	147	242	23			KEGG	Small cell lung cancer	KEGG:05222	1.79478e-12	11.746	92	188	20		KEGG	African trypanosomiasis	KEGG:05143	0.00016008	3.79566	36	86	6
KEGG	Amoebiasis	KEGG:05146	1.22793e-08	7.91083	101	242	19			KEGG	C-type lectin receptor signaling pathway	KEGG:04625	1.85879e-12	11.7308	104	188	21		KEGG	Fluid shear stress and atherosclerosis	KEGG:05418	0.000160548	3.7944	138	86	10
KEGG	VEGF signaling pathway	KEGG:04370	1.31135e-08	7.88228	59	242	15			KEGG	Breast cancer	KEGG:05224	3.42601e-12	11.4652	147	188	24		KEGG	Salmonella infection	KEGG:05132	0.000177983	3.74962	249	86	13
KEGG	Relaxin signaling pathway	KEGG:04926	2.15279e-08	7.667	129	242	21			KEGG	Measles	KEGG:05162	9.03558e-12	11.044	139	188	23		KEGG	Legionellosis	KEGG:05134	0.000182396	3.73898	57	86	7
KEGG	Hepatitis C	KEGG:05160	2.56407e-08	7.59107	157	242	23			KEGG	Fc epsilon RI signaling pathway	KEGG:04664	1.16341e-11	10.9343	67	188	17		KEGG	Small cell lung cancer	KEGG:05222	0.00047118	3.32681	92	86	8
KEGG	Non-small cell lung cancer	KEGG:05223	2.78138e-08	7.55574	72	242	16			KEGG	Endometrial cancer	KEGG:05213	1.50622e-11	10.8221	58	188	16		KEGG	Adipocytokine signaling pathway	KEGG:04920	0.00067078	3.17342	69	86	7
KEGG	African trypanosomiasis	KEGG:05143	3.00318e-08	7.52242	36	242	12			KEGG	Renal cell carcinoma	KEGG:05211	1.51975e-11	10.8182	68	188	17		KEGG	Epithelial cell signaling in Helicobacter pylori infection	KEGG:05120	0.000738879	3.13143	70	86	7
KEGG	Insulin resistance	KEGG:04931	4.11334e-08	7.38581	108	242	19			KEGG	VEGF signaling pathway	KEGG:04370	2.0247e-11	10.6936	59	188	16		KEGG	Viral carcinogenesis	KEGG:05203	0.000777733	3.10917	202	86	11
KEGG	Colorectal cancer	KEGG:05210	5.36226e-08	7.27065	86	242	17			KEGG	Central carbon metabolism in cancer	KEGG:05230	2.55646e-11	10.5924	70	188	17		KEGG	Non-small cell lung cancer	KEGG:05223	0.000892368	3.04946	72	86	7
KEGG	Renal cell carcinoma	KEGG:05211	1.1435e-07	6.94176	68	242	15			KEGG	Prolactin signaling pathway	KEGG:04917	2.55646e-11	10.5924	70	188	17		KEGG	NF-kappa B signaling pathway	KEGG:04064	0.0010175	2.99247	102	86	8
KEGG	Cellular senescence	KEGG:04218	1.35137e-07	6.86923	156	242	22			KEGG	Human immunodeficiency virus 1 infection	KEGG:05170	3.19657e-11	10.4953	210	188	27		KEGG	Regulation of actin cytoskeleton	KEGG:04810	0.00146509	2.83414	216	86	11
KEGG	FoxO signaling pathway	KEGG:04068	1.90776e-07	6.71948	131	242	20			KEGG	Non-small cell lung cancer	KEGG:05223	4.22351e-11	10.3743	72	188	17		KEGG	TNF signaling pathway	KEGG:04668	0.00202224	2.69417	112	86	8
KEGG	Necroptosis	KEGG:04217	1.95445e-07	6.70898	159	242	22			KEGG	Ras signaling pathway	KEGG:04014	4.96587e-11	10.304	231	188	28		KEGG	Graft-versus-host disease	KEGG:05332	0.00349189	2.45694	37	86	5
KEGG	Sphingolipid signaling pathway	KEGG:04071	2.27494e-07	6.64303	119	242	19			KEGG	Hepatocellular carcinoma	KEGG:05225	5.48665e-11	10.2607	166	188	24		KEGG	Cytosolic DNA-sensing pathway	KEGG:04623	0.0040415	2.39346	62	86	6
KEGG	Hematopoietic cell lineage	KEGG:04640	2.70895e-07	6.5672	95	242	17			KEGG	Viral protein interaction with cytokine and cytokine receptor	KEGG:04061	7.58752e-11	10.1199	98	188	19		KEGG	TGF-beta signaling pathway	KEGG:04350	0.00478448	2.32017	93	86	7
KEGG	Prostate cancer	KEGG:05215	3.78137e-07	6.42235	97	242	17			KEGG	MicroRNAs in cancer	KEGG:05206	8.16612e-11	10.088	310	188	32		KEGG	Hematopoietic cell lineage	KEGG:04640	0.00548486	2.26083	95	86	7
KEGG	Pathogenic Escherichia coli infection	KEGG:05130	4.30911e-07	6.36561	196	242	24			KEGG	Th1 and Th2 cell differentiation	KEGG:04658	1.46217e-10	9.835	89	188	18		KEGG	FoxO signaling pathway	KEGG:04068	0.00623541	2.20514	131	86	8
KEGG	Salmonella infection	KEGG:05132	6.53035e-07	6.18506	249	242	27			KEGG	NOD-like receptor signaling pathway	KEGG:04621	2.2966e-10	9.63892	177	188	24		KEGG	Vascular smooth muscle contraction	KEGG:04270	0.00694064	2.1586	133	86	8
KEGG	Legionellosis	KEGG:05134	9.85271e-07	6.00644	57	242	13			KEGG	Relaxin signaling pathway	KEGG:04926	1.4321e-09	8.84403	129	188	20		KEGG	Prolactin signaling pathway	KEGG:04917	0.00804857	2.09428	70	86	6
KEGG	B cell receptor signaling pathway	KEGG:04662	1.03247e-06	5.98612	79	242	15			KEGG	Salmonella infection	KEGG:05132	1.93262e-09	8.71385	249	188	27		KEGG	RIG-I-like receptor signaling pathway	KEGG:04622	0.00804857	2.09428	70	86	6
KEGG	Adipocytokine signaling pathway	KEGG:04920	1.32362e-06	5.87824	69	242	14			KEGG	B cell receptor signaling pathway	KEGG:04662	2.63978e-09	8.57843	79	188	16		KEGG	Parathyroid hormone synthesis, secretion and action	KEGG:04928	0.0109981	1.95868	106	86	7
KEGG	MAPK signaling pathway	KEGG:04010	1.51781e-06	5.81878	294	242	29			KEGG	Sphingolipid signaling pathway	KEGG:04071	2.80022e-09	8.55281	119	188	19		KEGG	Chronic myeloid leukemia	KEGG:05220	0.0127476	1.89457	76	86	6
KEGG	Human papillomavirus infection	KEGG:05165	1.59159e-06	5.79817	331	242	31			KEGG	Thyroid hormone signaling pathway	KEGG:04919	3.78856e-09	8.42153	121	188	19		KEGG	Pancreatic cancer	KEGG:05212	0.0127476	1.89457	76	86	6
KEGG	Endocrine resistance	KEGG:01522	2.00284e-06	5.69835	95	242	16			KEGG	Tuberculosis	KEGG:05152	9.23246e-09	8.03468	175	188	22		KEGG	HIF-1 signaling pathway	KEGG:04066	0.0131028	1.88264	109	86	7
KEGG	ErbB signaling pathway	KEGG:04012	2.47791e-06	5.60591	84	242	15			KEGG	Rap1 signaling pathway	KEGG:04015	9.31428e-09	8.03085	210	188	24		KEGG	Neutrophil extracellular trap formation	KEGG:04613	0.0149326	1.82586	189	86	9
KEGG	Leukocyte transendothelial migration	KEGG:04670	4.6985e-06	5.32804	114	242	17			KEGG	Rheumatoid arthritis	KEGG:05323	1.47296e-08	7.83181	88	188	16		KEGG	EGFR tyrosine kinase inhibitor resistance	KEGG:01521	0.0157968	1.80143	79	86	6
KEGG	Chronic myeloid leukemia	KEGG:05220	4.87133e-06	5.31235	76	242	14			KEGG	Regulation of actin cytoskeleton	KEGG:04810	1.68705e-08	7.77287	216	188	24		KEGG	Non-alcoholic fatty liver disease	KEGG:04932	0.016063	1.79417	150	86	8
KEGG	Neutrophil extracellular trap formation	KEGG:04613	5.01643e-06	5.29961	189	242	22			KEGG	Neurotrophin signaling pathway	KEGG:04722	2.40988e-08	7.618	119	188	18		KEGG	Human papillomavirus infection	KEGG:05165	0.0164318	1.78432	331	86	12
KEGG	Rap1 signaling pathway	KEGG:04015	7.71253e-06	5.1128	210	242	23			KEGG	Growth hormone synthesis, secretion and action	KEGG:04935	2.40988e-08	7.618	119	188	18		KEGG	Cellular senescence	KEGG:04218	0.021021	1.67735	156	86	8
KEGG	Human immunodeficiency virus 1 infection	KEGG:05170	7.71253e-06	5.1128	210	242	23			KEGG	Adipocytokine signaling pathway	KEGG:04920	4.71203e-08	7.32679	69	188	14		KEGG	Thyroid hormone signaling pathway	KEGG:04919	0.0250289	1.60156	121	86	7
KEGG	Type II diabetes mellitus	KEGG:04930	8.26089e-06	5.08297	46	242	11			KEGG	Signaling pathways regulating pluripotency of stem cells	KEGG:04550	7.34157e-08	7.13421	143	188	19		KEGG	Colorectal cancer	KEGG:05210	0.0251655	1.59919	86	86	6
KEGG	Ras signaling pathway	KEGG:04014	1.09074e-05	4.96228	231	242	24			KEGG	Pathogenic Escherichia coli infection	KEGG:05130	8.49416e-08	7.07088	196	188	22		KEGG	Antifolate resistance	KEGG:01523	0.0258136	1.58815	31	86	4
KEGG	Hepatocellular carcinoma	KEGG:05225	1.18194e-05	4.9274	166	242	20			KEGG	Leukocyte transendothelial migration	KEGG:04670	9.78309e-08	7.00952	114	188	17		KEGG	Relaxin signaling pathway	KEGG:04926	0.036974	1.4321	129	86	7
KEGG	Central carbon metabolism in cancer	KEGG:05230	1.34589e-05	4.87099	70	242	13			KEGG	Amoebiasis	KEGG:05146	1.24565e-07	6.9046	101	188	16		KEGG	Prostate cancer	KEGG:05215	0.0481448	1.31745	97	86	6
KEGG	Focal adhesion	KEGG:04510	1.3915e-05	4.85652	200	242	22			KEGG	Apelin signaling pathway	KEGG:04371	2.24604e-07	6.64858	136	188	18		REAC	Signaling by Interleukins	REAC:R-HSA-449147	6.11611e-25	24.2135	459	89	37
KEGG	Signaling pathways regulating pluripotency of stem cells	KEGG:04550	2.6772e-05	4.57232	143	242	18			KEGG	Autophagy - animal	KEGG:04140	2.53327e-07	6.59632	137	188	18		REAC	Cytokine Signaling in Immune system	REAC:R-HSA-1280215	1.38275e-19	18.8593	696	89	38
KEGG	Non-alcoholic fatty liver disease	KEGG:04932	5.52911e-05	4.25734	150	242	18			KEGG	Insulin resistance	KEGG:04931	3.4334e-07	6.46428	108	188	16		REAC	Immune System	REAC:R-HSA-168256	5.00364e-17	16.3007	2038	89	56
KEGG	Viral carcinogenesis	KEGG:05203	7.03487e-05	4.15274	202	242	21			KEGG	Necroptosis	KEGG:04217	4.52468e-07	6.34441	159	188	19		REAC	Interleukin-4 and Interleukin-13 signaling	REAC:R-HSA-6785807	2.20486e-13	12.6566	110	89	16
KEGG	Diabetic cardiomyopathy	KEGG:05415	7.63733e-05	4.11706	203	242	21			KEGG	RIG-I-like receptor signaling pathway	KEGG:04622	6.33612e-07	6.19818	70	188	13		REAC	Signal Transduction	REAC:R-HSA-162582	2.56112e-10	9.59157	2730	89	55
KEGG	Natural killer cell mediated cytotoxicity	KEGG:04650	8.06046e-05	4.09364	123	242	16			KEGG	Choline metabolism in cancer	KEGG:05231	6.829e-07	6.16564	98	188	15		REAC	Interleukin-2 signaling	REAC:R-HSA-9020558	7.15632e-10	9.14531	12	89	7
KEGG	Asthma	KEGG:05310	8.60096e-05	4.06545	27	242	8			KEGG	Inflammatory mediator regulation of TRP channels	KEGG:04750	6.829e-07	6.16564	98	188	15		REAC	Interleukin-2 family signaling	REAC:R-HSA-451927	8.18081e-10	9.0872	44	89	10
KEGG	Platelet activation	KEGG:04611	9.00792e-05	4.04538	124	242	16			KEGG	Phospholipase D signaling pathway	KEGG:04072	7.96705e-07	6.0987	147	188	18		REAC	Interleukin-1 family signaling	REAC:R-HSA-446652	4.21496e-08	7.37521	138	89	13
KEGG	Choline metabolism in cancer	KEGG:05231	0.000127783	3.89353	98	242	14			KEGG	Malaria	KEGG:05144	1.17986e-06	5.92817	49	188	11		REAC	Signaling by Receptor Tyrosine Kinases	REAC:R-HSA-9006934	1.41909e-07	6.84799	486	89	21
KEGG	Gastric cancer	KEGG:05226	0.000213864	3.66986	148	242	17			KEGG	Neutrophil extracellular trap formation	KEGG:04613	1.45511e-06	5.8371	189	188	20		REAC	Interleukin-18 signaling	REAC:R-HSA-9012546	8.29597e-07	6.08113	8	89	5
KEGG	Glioma	KEGG:05214	0.000219832	3.65791	75	242	12			KEGG	Apoptosis	KEGG:04210	1.54554e-06	5.81092	136	188	17		REAC	Interleukin-10 signaling	REAC:R-HSA-6783783	1.20996e-06	5.91723	45	89	8
KEGG	Small cell lung cancer	KEGG:05222	0.000350272	3.45559	92	242	13			KEGG	mTOR signaling pathway	KEGG:04150	1.67822e-06	5.77515	154	188	18		REAC	Interleukin-3, Interleukin-5 and GM-CSF signaling	REAC:R-HSA-512988	1.74127e-06	5.75913	47	89	8
KEGG	Intestinal immune network for IgA production	KEGG:04672	0.000638132	3.19509	45	242	9			KEGG	Axon guidance	KEGG:04360	3.89325e-06	5.40969	181	188	19		REAC	Interleukin-9 signaling	REAC:R-HSA-8985947	1.85429e-06	5.73182	9	89	5
KEGG	MicroRNAs in cancer	KEGG:05206	0.000679221	3.16799	310	242	25			KEGG	Viral carcinogenesis	KEGG:05203	4.52024e-06	5.34484	202	188	20		REAC	Interleukin-20 family signaling	REAC:R-HSA-8854691	1.86354e-05	4.72966	25	89	6
KEGG	Epithelial cell signaling in Helicobacter pylori infection	KEGG:05120	0.000705221	3.15167	70	242	11			KEGG	Epithelial cell signaling in Helicobacter pylori infection	KEGG:05120	6.32136e-06	5.19919	70	188	12		REAC	MAPK1 (ERK2) activation	REAC:R-HSA-112411	0.000128784	3.89014	8	89	4
KEGG	Endometrial cancer	KEGG:05213	0.000790978	3.10184	58	242	10			KEGG	Estrogen signaling pathway	KEGG:04915	1.09979e-05	4.95869	137	188	16		REAC	MAPK3 (ERK1) activation	REAC:R-HSA-110056	0.000230327	3.63765	9	89	4
KEGG	Breast cancer	KEGG:05224	0.000867854	3.06155	147	242	16			KEGG	Thyroid cancer	KEGG:05216	1.24505e-05	4.90481	37	188	9		REAC	Interleukin-21 signaling	REAC:R-HSA-9020958	0.000381423	3.41859	10	89	4
KEGG	Calcium signaling pathway	KEGG:04020	0.00105018	2.97873	239	242	21			KEGG	Longevity regulating pathway - multiple species	KEGG:04213	1.57711e-05	4.80214	62	188	11		REAC	VEGFA-VEGFR2 Pathway	REAC:R-HSA-4420097	0.000447673	3.34904	94	89	8
KEGG	Apoptosis	KEGG:04210	0.00142131	2.84731	136	242	15			KEGG	Pertussis	KEGG:05133	1.62969e-05	4.78789	76	188	12		REAC	Sema4D in semaphorin signaling	REAC:R-HSA-400685	0.000566496	3.2468	24	89	5
KEGG	Longevity regulating pathway - multiple species	KEGG:04213	0.00146554	2.834	62	242	10			KEGG	TGF-beta signaling pathway	KEGG:04350	2.15959e-05	4.66563	93	188	13		REAC	Interleukin-6 family signaling	REAC:R-HSA-6783589	0.000566496	3.2468	24	89	5
KEGG	Cytosolic DNA-sensing pathway	KEGG:04623	0.00146554	2.834	62	242	10			KEGG	Diabetic cardiomyopathy	KEGG:05415	2.44511e-05	4.6117	203	188	19		REAC	Interleukin-6 signaling	REAC:R-HSA-1059683	0.000595544	3.22509	11	89	4
KEGG	Autophagy - animal	KEGG:04140	0.0015536	2.80866	137	242	15			KEGG	Adherens junction	KEGG:04520	6.60833e-05	4.17991	71	188	11		REAC	Innate Immune System	REAC:R-HSA-168249	0.00078169	3.10697	1090	89	25
KEGG	Transcriptional misregulation in cancer	KEGG:05202	0.00178802	2.74763	191	242	18			KEGG	Intestinal immune network for IgA production	KEGG:04672	7.53956e-05	4.12265	45	188	9		REAC	Interleukin receptor SHC signaling	REAC:R-HSA-912526	0.000865222	3.06287	26	89	5
KEGG	TGF-beta signaling pathway	KEGG:04350	0.002164	2.66474	93	242	12			KEGG	Longevity regulating pathway	KEGG:04211	9.55081e-05	4.01996	89	188	12		REAC	Signaling by VEGF	REAC:R-HSA-194138	0.00096776	3.01423	104	89	8
KEGG	Bladder cancer	KEGG:05219	0.0025649	2.59093	41	242	8			KEGG	GnRH secretion	KEGG:04929	0.000199204	3.7007	64	188	10		REAC	Disease	REAC:R-HSA-1643685	0.00142922	2.8449	1616	89	31
KEGG	Fc gamma R-mediated phagocytosis	KEGG:04666	0.00299455	2.52367	96	242	12			KEGG	Asthma	KEGG:05310	0.000206558	3.68496	27	188	7		REAC	Interleukin-15 signaling	REAC:R-HSA-8983432	0.00177205	2.75152	14	89	4
KEGG	RIG-I-like receptor signaling pathway	KEGG:04622	0.0043729	2.35923	70	242	10			KEGG	Non-alcoholic fatty liver disease	KEGG:04932	0.000208224	3.68147	150	188	15		REAC	IL-6-type cytokine receptor ligand interactions	REAC:R-HSA-6788467	0.00413301	2.38373	17	89	4
KEGG	Adherens junction	KEGG:04520	0.00495657	2.30482	71	242	10			KEGG	Insulin signaling pathway	KEGG:04910	0.000356319	3.44816	137	188	14		REAC	Interleukin-7 signaling	REAC:R-HSA-1266695	0.00464216	2.33328	36	89	5
KEGG	Allograft rejection	KEGG:05330	0.00579994	2.23658	34	242	7			KEGG	Herpes simplex virus 1 infection	KEGG:05168	0.000372953	3.42835	494	188	29		REAC	Semaphorin interactions	REAC:R-HSA-373755	0.0060732	2.21658	64	89	6
KEGG	Apelin signaling pathway	KEGG:04371	0.00598416	2.223	136	242	14			KEGG	Natural killer cell mediated cytotoxicity	KEGG:04650	0.00055171	3.25829	123	188	13		REAC	p75 NTR receptor-mediated signalling	REAC:R-HSA-193704	0.00652709	2.18528	97	89	7
KEGG	cAMP signaling pathway	KEGG:04024	0.00918677	2.03684	216	242	18			KEGG	Gap junction	KEGG:04540	0.000583428	3.23401	88	188	11		REAC	RHO GTPases Activate ROCKs	REAC:R-HSA-5627117	0.00664518	2.17749	19	89	4
KEGG	Thyroid cancer	KEGG:05216	0.0102728	1.98831	37	242	7			KEGG	Platelet activation	KEGG:04611	0.000603797	3.21911	124	188	13		REAC	Erythropoietin activates STAT5	REAC:R-HSA-9027283	0.00796151	2.099	7	89	3
KEGG	GnRH signaling pathway	KEGG:04912	0.0107607	1.96816	93	242	11			KEGG	Type II diabetes mellitus	KEGG:04930	0.000952361	3.0212	46	188	8		REAC	Sema4D induced cell migration and growth-cone collapse	REAC:R-HSA-416572	0.00825344	2.08337	20	89	4
KEGG	GnRH secretion	KEGG:04929	0.0120178	1.92017	64	242	9			KEGG	Transcriptional misregulation in cancer	KEGG:05202	0.000961055	3.01725	191	188	16		REAC	Death Receptor Signalling	REAC:R-HSA-73887	0.00878193	2.05641	140	89	8
KEGG	Vascular smooth muscle contraction	KEGG:04270	0.0186363	1.72964	133	242	13			KEGG	Fc gamma R-mediated phagocytosis	KEGG:04666	0.00136512	2.86483	96	188	11		REAC	Interleukin-37 signaling	REAC:R-HSA-9008059	0.0101303	1.99438	21	89	4
KEGG	Insulin signaling pathway	KEGG:04910	0.0250646	1.60094	137	242	13			KEGG	African trypanosomiasis	KEGG:05143	0.00162324	2.78962	36	188	7		REAC	RAF-independent MAPK1/3 activation	REAC:R-HSA-112409	0.0123025	1.91001	22	89	4
KEGG	Regulation of lipolysis in adipocytes	KEGG:04923	0.0257796	1.58872	56	242	8			KEGG	Hippo signaling pathway	KEGG:04390	0.00174156	2.75906	157	188	14		REAC	NR1H2 & NR1H3 regulate gene expression linked to lipogenesis	REAC:R-HSA-9029558	0.0126611	1.89753	8	89	3
KEGG	Melanoma	KEGG:05218	0.0300982	1.52146	72	242	9			KEGG	AMPK signaling pathway	KEGG:04152	0.002247	2.6484	120	188	12		REAC	NR1H2 and NR1H3-mediated signaling	REAC:R-HSA-9024446	0.0141782	1.84838	45	89	5
KEGG	Longevity regulating pathway	KEGG:04211	0.033896	1.46985	89	242	10			KEGG	Parathyroid hormone synthesis, secretion and action	KEGG:04928	0.00350837	2.45489	106	188	11		REAC	Toll-like Receptor Cascades	REAC:R-HSA-168898	0.0158851	1.79901	152	89	8
KEGG	Parathyroid hormone synthesis, secretion and action	KEGG:04928	0.0347288	1.45931	106	242	11			KEGG	GnRH signaling pathway	KEGG:04912	0.00588918	2.22995	93	188	10		REAC	Leishmania infection	REAC:R-HSA-9658195	0.0175214	1.75643	303	89	11
KEGG	Axon guidance	KEGG:04360	0.0377935	1.42258	181	242	15			KEGG	Oxytocin signaling pathway	KEGG:04921	0.00621514	2.20655	154	188	13		REAC	Interleukin-12 signaling	REAC:R-HSA-9020591	0.0175681	1.75527	47	89	5
KEGG	cGMP-PKG signaling pathway	KEGG:04022	0.0495417	1.30503	166	242	14			KEGG	Antifolate resistance	KEGG:01523	0.00686556	2.16332	31	188	6		REAC	Cell recruitment (pro-inflammatory response)	REAC:R-HSA-9664424	0.0176436	1.75341	24	89	4
REAC	Signaling by Interleukins	REAC:R-HSA-449147	5.76921e-68	67.2389	459	247	98			KEGG	Hematopoietic cell lineage	KEGG:04640	0.00707234	2.15044	95	188	10		REAC	Diseases associated with the TLR signaling cascade	REAC:R-HSA-5602358	0.0176436	1.75341	24	89	4
REAC	Cytokine Signaling in Immune system	REAC:R-HSA-1280215	5.36982e-63	62.27	696	247	110			KEGG	Cytosolic DNA-sensing pathway	KEGG:04623	0.00895114	2.04812	62	188	8		REAC	Diseases of Immune System	REAC:R-HSA-5260271	0.0176436	1.75341	24	89	4
REAC	Immune System	REAC:R-HSA-168256	1.41819e-44	43.8483	2038	247	149			KEGG	Alzheimer disease	KEGG:05010	0.0142043	1.84758	369	188	21		REAC	Purinergic signaling in leishmaniasis infection	REAC:R-HSA-9660826	0.0176436	1.75341	24	89	4
REAC	Interleukin-4 and Interleukin-13 signaling	REAC:R-HSA-6785807	3.39156e-38	37.4696	110	247	42			KEGG	Calcium signaling pathway	KEGG:04020	0.014759	1.83094	239	188	16		REAC	RHO GTPases Activate NADPH Oxidases	REAC:R-HSA-5668599	0.0176436	1.75341	24	89	4
REAC	Interleukin-10 signaling	REAC:R-HSA-6783783	3.70742e-27	26.4309	45	247	25			KEGG	cAMP signaling pathway	KEGG:04024	0.0159426	1.79744	216	188	15		REAC	CD163 mediating an anti-inflammatory response	REAC:R-HSA-9662834	0.0188766	1.72408	9	89	3
REAC	Signal Transduction	REAC:R-HSA-162582	6.24444e-19	18.2045	2730	247	133			KEGG	Platinum drug resistance	KEGG:01524	0.0259387	1.58605	72	188	8		REAC	Signaling by Leptin	REAC:R-HSA-2586552	0.0188766	1.72408	9	89	3
REAC	Chemokine receptors bind chemokines	REAC:R-HSA-380108	2.30207e-16	15.6379	57	247	20			KEGG	Bacterial invasion of epithelial cells	KEGG:05100	0.0412652	1.38442	77	188	8		REAC	Infectious disease	REAC:R-HSA-5663205	0.0196498	1.70664	909	89	20
REAC	Interleukin-2 family signaling	REAC:R-HSA-451927	5.28212e-16	15.2772	44	247	18			KEGG	Progesterone-mediated oocyte maturation	KEGG:04914	0.0494487	1.30584	99	188	9		REAC	MAPK family signaling cascades	REAC:R-HSA-5683057	0.0203354	1.69175	308	89	11
REAC	Class A/1 (Rhodopsin-like receptors)	REAC:R-HSA-373076	7.83749e-15	14.1058	328	247	39			REAC	Signaling by Interleukins	REAC:R-HSA-449147	1.62075e-52	51.7903	459	200	78		REAC	Potential therapeutics for SARS	REAC:R-HSA-9679191	0.0203646	1.69112	79	89	6
REAC	Interleukin-1 family signaling	REAC:R-HSA-446652	3.54879e-12	11.4499	138	247	24			REAC	Cytokine Signaling in Immune system	REAC:R-HSA-1280215	5.85615e-47	46.2324	696	200	86		REAC	RHO GTPase Effectors	REAC:R-HSA-195258	0.0279273	1.55397	319	89	11
REAC	Signaling by Receptor Tyrosine Kinases	REAC:R-HSA-9006934	8.12077e-12	11.0904	486	247	43			REAC	Interleukin-4 and Interleukin-13 signaling	REAC:R-HSA-6785807	1.49828e-31	30.8244	110	200	35		REAC	MAPK1/MAPK3 signaling	REAC:R-HSA-5684996	0.0328518	1.48344	269	89	10
REAC	GPCR ligand binding	REAC:R-HSA-500792	2.60254e-11	10.5846	459	247	41			REAC	Immune System	REAC:R-HSA-168256	1.27017e-29	28.8961	2038	200	113		REAC	EPHA-mediated growth cone collapse	REAC:R-HSA-3928663	0.0331381	1.47967	28	89	4
REAC	Interleukin-20 family signaling	REAC:R-HSA-8854691	3.15e-11	10.5017	25	247	12			REAC	Signaling by Receptor Tyrosine Kinases	REAC:R-HSA-9006934	4.07416e-22	21.39	486	200	51		REAC	Signaling by ERBB4	REAC:R-HSA-1236394	0.0345895	1.46106	54	89	5
REAC	Interleukin-3, Interleukin-5 and GM-CSF signaling	REAC:R-HSA-512988	3.29261e-11	10.4825	47	247	15			REAC	Signal Transduction	REAC:R-HSA-162582	3.90103e-21	20.4088	2730	200	118		REAC	Interleukin-27 signaling	REAC:R-HSA-9020956	0.0366308	1.43615	11	89	3
REAC	Peptide ligand-binding receptors	REAC:R-HSA-375276	1.76588e-10	9.75304	195	247	26			REAC	Diseases of signal transduction by growth factor receptors and second messengers	REAC:R-HSA-5663202	1.16583e-17	16.9334	380	200	41		REAC	Signaling by Rho GTPases, Miro GTPases and RHOBTB3	REAC:R-HSA-9716542	0.0442028	1.35455	459	89	13
REAC	Innate Immune System	REAC:R-HSA-168249	1.5704e-09	8.80399	1090	247	63			REAC	PI3K/AKT Signaling in Cancer	REAC:R-HSA-2219528	2.17354e-17	16.6628	92	200	23		REAC	Signaling by Rho GTPases	REAC:R-HSA-194315	0.0442028	1.35455	459	89	13
REAC	Interleukin receptor SHC signaling	REAC:R-HSA-912526	2.02098e-09	8.69444	26	247	11			REAC	Negative regulation of the PI3K/AKT network	REAC:R-HSA-199418	1.32137e-16	15.879	99	200	23		REAC	Interleukin-12 family signaling	REAC:R-HSA-447115	0.0449013	1.34774	57	89	5
REAC	Toll Like Receptor TLR1:TLR2 Cascade	REAC:R-HSA-168179	2.87631e-09	8.54116	97	247	18			REAC	PI5P, PP2A and IER3 Regulate PI3K/AKT Signaling	REAC:R-HSA-6811558	4.16761e-16	15.3801	92	200	22		REAC	Chemokine receptors bind chemokines	REAC:R-HSA-380108	0.0449013	1.34774	57	89	5
REAC	Toll Like Receptor 2 (TLR2) Cascade	REAC:R-HSA-181438	2.87631e-09	8.54116	97	247	18			REAC	Extra-nuclear estrogen signaling	REAC:R-HSA-9009391	8.86568e-16	15.0523	73	200	20		REAC	Interleukin-35 Signalling	REAC:R-HSA-8984722	0.0485453	1.31385	12	89	3
REAC	G alpha (i) signalling events	REAC:R-HSA-418594	3.46643e-09	8.46012	398	247	35			REAC	PIP3 activates AKT signaling	REAC:R-HSA-1257604	1.57099e-13	12.8038	252	200	30		REAC	Regulation of IFNG signaling	REAC:R-HSA-877312	0.0485453	1.31385	12	89	3
REAC	Interleukin-12 family signaling	REAC:R-HSA-447115	1.22242e-08	7.91278	57	247	14			REAC	Interleukin-1 family signaling	REAC:R-HSA-446652	3.86965e-12	11.4123	138	200	22		REAC	Nuclear signaling by ERBB4	REAC:R-HSA-1251985	0.0499577	1.3014	31	89	4
REAC	Growth hormone receptor signaling	REAC:R-HSA-982772	1.39792e-08	7.85452	23	247	10			REAC	Intracellular signaling by second messengers	REAC:R-HSA-9006925	8.90544e-12	11.0503	292	200	30		WP	Cytokines and Inflammatory Response	WP:WP530	1.68264e-13	12.774	26	85	11
REAC	Interleukin-2 signaling	REAC:R-HSA-9020558	1.44214e-08	7.84099	12	247	8			REAC	Constitutive Signaling by Aberrant PI3K in Cancer	REAC:R-HSA-2219530	1.61485e-11	10.7919	65	200	16		WP	Development and heterogeneity of the ILC family	WP:WP3893	2.66171e-12	11.5748	32	85	11
REAC	MyD88:MAL(TIRAP) cascade initiated on plasma membrane	REAC:R-HSA-166058	1.73069e-08	7.76178	94	247	17			REAC	Estrogen-dependent nuclear events downstream of ESR-membrane signaling	REAC:R-HSA-9634638	6.61739e-11	10.1793	24	200	11		WP	Hepatitis B infection	WP:WP4666	6.71928e-12	11.1727	154	85	18
REAC	Toll Like Receptor TLR6:TLR2 Cascade	REAC:R-HSA-168188	1.73069e-08	7.76178	94	247	17			REAC	Interleukin-17 signaling	REAC:R-HSA-448424	7.22651e-11	10.1411	71	200	16		WP	AGE/RAGE pathway	WP:WP2324	3.01256e-11	10.5211	66	85	13
REAC	Signaling by SCF-KIT	REAC:R-HSA-1433557	1.7744e-08	7.75095	39	247	12			REAC	Downstream signal transduction	REAC:R-HSA-186763	1.98193e-10	9.70291	26	200	11		WP	Thymic Stromal LymphoPoietin (TSLP) Signaling Pathway	WP:WP2203	3.1375e-10	9.50342	47	85	11
REAC	Toll-like Receptor Cascades	REAC:R-HSA-168898	1.77647e-08	7.75044	152	247	21			REAC	Interleukin-10 signaling	REAC:R-HSA-6783783	4.4617e-10	9.3505	45	200	13		WP	Oncostatin M Signaling Pathway	WP:WP2374	7.40714e-10	9.13035	66	85	12
REAC	Toll Like Receptor 4 (TLR4) Cascade	REAC:R-HSA-166016	3.30048e-08	7.48142	126	247	19			REAC	ESR-mediated signaling	REAC:R-HSA-8939211	8.89224e-10	9.05099	217	200	24		WP	IL-4 Signaling Pathway	WP:WP395	2.00498e-09	8.69789	55	85	11
REAC	Interleukin-9 signaling	REAC:R-HSA-8985947	4.83253e-08	7.31583	9	247	7			REAC	Disease	REAC:R-HSA-1643685	9.50358e-10	9.02211	1616	200	70		WP	Leptin signaling pathway	WP:WP2034	4.26593e-09	8.36999	76	85	12
REAC	Signaling by VEGF	REAC:R-HSA-194138	9.1774e-08	7.03728	104	247	17			REAC	GAB1 signalosome	REAC:R-HSA-180292	1.03989e-09	8.98301	16	200	9		WP	Spinal Cord Injury	WP:WP2431	4.68104e-09	8.32966	118	85	14
REAC	RUNX1 and FOXP3 control the development of regulatory T lymphocytes (Tregs)	REAC:R-HSA-8877330	1.57899e-07	6.80162	10	247	7			REAC	Signaling by SCF-KIT	REAC:R-HSA-1433557	1.46545e-09	8.83403	39	200	12		WP	COVID-19 Adverse Outcome Pathway	WP:WP4891	1.41903e-08	7.84801	15	85	7
REAC	VEGFA-VEGFR2 Pathway	REAC:R-HSA-4420097	1.69513e-07	6.7708	94	247	16			REAC	MAPK family signaling cascades	REAC:R-HSA-5683057	1.46935e-09	8.83287	308	200	28		WP	Allograft Rejection	WP:WP2328	2.53479e-08	7.59606	88	85	12
REAC	Interleukin-6 signaling	REAC:R-HSA-1059683	4.25638e-07	6.37096	11	247	7			REAC	Signaling by phosphorylated juxtamembrane, extracellular and kinase domain KIT mutants	REAC:R-HSA-9670439	2.17399e-09	8.66274	17	200	9		WP	Non-genomic actions of 1,25 dihydroxyvitamin D3	WP:WP4341	3.16558e-08	7.49955	70	85	11
REAC	Diseases of Immune System	REAC:R-HSA-5260271	6.8513e-07	6.16423	24	247	9			REAC	Signaling by KIT in disease	REAC:R-HSA-9669938	2.17399e-09	8.66274	17	200	9		WP	Regulation of toll-like receptor signaling pathway	WP:WP1449	7.6876e-08	7.11421	145	85	14
REAC	Diseases associated with the TLR signaling cascade	REAC:R-HSA-5602358	6.8513e-07	6.16423	24	247	9			REAC	Interleukin-2 family signaling	REAC:R-HSA-451927	7.27782e-09	8.138	44	200	12		WP	Viral Acute Myocarditis	WP:WP4298	3.51232e-07	6.45441	87	85	11
REAC	Purinergic signaling in leishmaniasis infection	REAC:R-HSA-9660826	6.8513e-07	6.16423	24	247	9			REAC	Signaling by Nuclear Receptors	REAC:R-HSA-9006931	1.37566e-08	7.86149	291	200	26		WP	Vitamin D in inflammatory diseases	WP:WP4482	3.52939e-07	6.4523	22	85	7
REAC	Cell recruitment (pro-inflammatory response)	REAC:R-HSA-9664424	6.8513e-07	6.16423	24	247	9			REAC	Toll Like Receptor 4 (TLR4) Cascade	REAC:R-HSA-166016	7.44105e-08	7.12837	126	200	17		WP	Control of immune tolerance by vasoactive intestinal peptide	WP:WP4484	3.65418e-07	6.43721	13	85	6
REAC	Interleukin-35 Signalling	REAC:R-HSA-8984722	1.00134e-06	5.99942	12	247	7			REAC	MyD88:MAL(TIRAP) cascade initiated on plasma membrane	REAC:R-HSA-166058	8.08531e-08	7.0923	94	200	15		WP	Chemokine signaling pathway	WP:WP3929	4.25634e-07	6.37096	165	85	14
REAC	Diseases of signal transduction by growth factor receptors and second messengers	REAC:R-HSA-5663202	1.62462e-06	5.78925	380	247	30			REAC	Toll Like Receptor TLR6:TLR2 Cascade	REAC:R-HSA-168188	8.08531e-08	7.0923	94	200	15		WP	Hepatitis C and Hepatocellular Carcinoma	WP:WP3646	4.30482e-07	6.36604	50	85	9
REAC	Interleukin-18 signaling	REAC:R-HSA-9012546	1.65677e-06	5.78074	8	247	6			REAC	MAPK1/MAPK3 signaling	REAC:R-HSA-5684996	8.60034e-08	7.06548	269	200	24		WP	SARS-CoV-2 Innate Immunity Evasion and Cell-specific immune response	WP:WP5039	4.31152e-07	6.36537	68	85	10
REAC	Negative regulation of the PI3K/AKT network	REAC:R-HSA-199418	3.212e-06	5.49322	99	247	15			REAC	Signaling by ERBB4	REAC:R-HSA-1236394	1.00377e-07	6.99837	54	200	12		WP	Androgen receptor signaling pathway	WP:WP138	5.07796e-07	6.29431	90	85	11
REAC	TRAF6 mediated induction of NFkB and MAP kinases upon TLR7/8 or 9 activation	REAC:R-HSA-975138	6.25265e-06	5.20394	89	247	14			REAC	Signaling by PDGF	REAC:R-HSA-186797	1.00377e-07	6.99837	54	200	12		WP	Gastrin Signaling Pathway	WP:WP4659	5.39205e-07	6.26825	114	85	12
REAC	MyD88 dependent cascade initiated on endosome	REAC:R-HSA-975155	7.25284e-06	5.13949	90	247	14			REAC	TRIF(TICAM1)-mediated TLR4 signaling	REAC:R-HSA-937061	1.10097e-07	6.95822	96	200	15		WP	T-Cell antigen Receptor (TCR) Signaling Pathway	WP:WP69	5.72407e-07	6.2423	91	85	11
REAC	Toll Like Receptor 7/8 (TLR7/8) Cascade	REAC:R-HSA-168181	8.39602e-06	5.07593	91	247	14			REAC	MyD88-independent TLR4 cascade	REAC:R-HSA-166166	1.10097e-07	6.95822	96	200	15		WP	ncRNAs involved in STAT3 signaling in hepatocellular carcinoma	WP:WP4337	1.65988e-06	5.77992	16	85	6
REAC	Interleukin-21 signaling	REAC:R-HSA-9020958	1.19473e-05	4.92273	10	247	6			REAC	Toll Like Receptor 2 (TLR2) Cascade	REAC:R-HSA-181438	1.28104e-07	6.89244	97	200	15		WP	Fibrin Complement Receptor 3 Signaling Pathway	WP:WP4136	2.1204e-06	5.67358	42	85	8
REAC	Toll Like Receptor 9 (TLR9) Cascade	REAC:R-HSA-168138	1.28738e-05	4.89029	94	247	14			REAC	Toll Like Receptor TLR1:TLR2 Cascade	REAC:R-HSA-168179	1.28104e-07	6.89244	97	200	15		WP	Toll-like Receptor Signaling Pathway	WP:WP75	2.39781e-06	5.62019	104	85	11
REAC	RHO GTPases Activate NADPH Oxidases	REAC:R-HSA-5668599	1.68181e-05	4.77422	24	247	8			REAC	Toll-like Receptor Cascades	REAC:R-HSA-168898	1.89938e-07	6.72139	152	200	18		WP	Airway smooth muscle cell contraction	WP:WP4962	2.54229e-06	5.59477	17	85	6
REAC	MyD88-independent TLR4 cascade	REAC:R-HSA-166166	1.69603e-05	4.77057	96	247	14			REAC	Interleukin-3, Interleukin-5 and GM-CSF signaling	REAC:R-HSA-512988	3.16292e-07	6.49991	47	200	11		WP	Interleukin-11 Signaling Pathway	WP:WP2332	3.12652e-06	5.50494	44	85	8
REAC	TRIF(TICAM1)-mediated TLR4 signaling	REAC:R-HSA-937061	1.69603e-05	4.77057	96	247	14			REAC	TRAF6 mediated induction of NFkB and MAP kinases upon TLR7/8 or 9 activation	REAC:R-HSA-975138	4.04277e-07	6.39332	89	200	14		WP	miRNAs involvement in the immune response in sepsis	WP:WP4329	3.6125e-06	5.44219	63	85	9
REAC	Signaling by KIT in disease	REAC:R-HSA-9669938	2.22544e-05	4.65258	17	247	7			REAC	MyD88 dependent cascade initiated on endosome	REAC:R-HSA-975155	4.70909e-07	6.32706	90	200	14		WP	Aryl Hydrocarbon Receptor Pathway	WP:WP2873	6.41872e-06	5.19255	48	85	8
REAC	Signaling by phosphorylated juxtamembrane, extracellular and kinase domain KIT mutants	REAC:R-HSA-9670439	2.22544e-05	4.65258	17	247	7			REAC	Toll Like Receptor 7/8 (TLR7/8) Cascade	REAC:R-HSA-168181	5.47416e-07	6.26168	91	200	14		WP	IL-3 Signaling Pathway	WP:WP286	7.60165e-06	5.11909	49	85	8
REAC	Interleukin-27 signaling	REAC:R-HSA-9020956	2.57733e-05	4.58883	11	247	6			REAC	Signal transduction by L1	REAC:R-HSA-445144	5.8427e-07	6.23339	20	200	8		WP	IL-18 signaling pathway	WP:WP4754	8.18461e-06	5.087	279	85	16
REAC	Interleukin-17 signaling	REAC:R-HSA-448424	3.00307e-05	4.52243	71	247	12			REAC	Toll Like Receptor 3 (TLR3) Cascade	REAC:R-HSA-168164	6.35098e-07	6.19716	92	200	14		WP	RAC1/PAK1/p38/MMP2 Pathway	WP:WP3303	8.19001e-06	5.08672	69	85	9
REAC	Signaling by GPCR	REAC:R-HSA-372790	3.80041e-05	4.42017	1142	247	55			REAC	Toll Like Receptor 9 (TLR9) Cascade	REAC:R-HSA-168138	8.49951e-07	6.07061	94	200	14		WP	Netrin-UNC5B signaling Pathway	WP:WP4747	1.2343e-05	4.90858	52	85	8
REAC	Regulation of IFNG signaling	REAC:R-HSA-877312	5.05453e-05	4.29632	12	247	6			REAC	TNFR1-induced NFkappaB signaling pathway	REAC:R-HSA-5357956	1.035e-06	5.98506	30	200	9		WP	Photodynamic therapy-induced NF-kB survival signaling	WP:WP3617	1.23687e-05	4.90768	35	85	7
REAC	Leishmania infection	REAC:R-HSA-9658195	6.12061e-05	4.21321	303	247	24			REAC	RAF-independent MAPK1/3 activation	REAC:R-HSA-112409	1.43591e-06	5.84287	22	200	8		WP	Signal transduction through IL1R	WP:WP4496	1.23687e-05	4.90768	35	85	7
REAC	Disease	REAC:R-HSA-1643685	6.66329e-05	4.17631	1616	247	69			REAC	RAF/MAP kinase cascade	REAC:R-HSA-5673001	1.85329e-06	5.73206	264	200	22		WP	Prolactin Signaling Pathway	WP:WP2037	1.93167e-05	4.71407	76	85	9
REAC	Toll Like Receptor 3 (TLR3) Cascade	REAC:R-HSA-168164	7.65348e-05	4.11614	92	247	13			REAC	Growth hormone receptor signaling	REAC:R-HSA-982772	2.16638e-06	5.66426	23	200	8		WP	Adipogenesis	WP:WP236	2.66942e-05	4.57358	131	85	11
REAC	PI5P, PP2A and IER3 Regulate PI3K/AKT Signaling	REAC:R-HSA-6811558	7.65348e-05	4.11614	92	247	13			REAC	FGFR1 mutant receptor activation	REAC:R-HSA-1839124	6.57569e-06	5.18206	26	200	8		WP	TGF-beta Receptor Signaling	WP:WP560	2.97682e-05	4.52625	58	85	8
REAC	Interleukin-37 signaling	REAC:R-HSA-9008059	0.000122866	3.91057	21	247	7			REAC	Signaling by NTRKs	REAC:R-HSA-166520	8.11593e-06	5.09066	130	200	15		WP	EGF/EGFR Signaling Pathway	WP:WP437	3.04094e-05	4.51699	163	85	12
REAC	Intracellular signaling by second messengers	REAC:R-HSA-9006925	0.000124673	3.90423	292	247	23			REAC	MAP kinase activation	REAC:R-HSA-450294	8.59672e-06	5.06567	63	200	11		WP	Senescence and Autophagy in Cancer	WP:WP615	3.99051e-05	4.39897	108	85	10
REAC	Signaling by NTRKs	REAC:R-HSA-166520	0.000132711	3.87709	130	247	15			REAC	Innate Immune System	REAC:R-HSA-168249	1.4561e-05	4.83681	1090	200	47		WP	Novel intracellular components of RIG-I-like receptor (RLR) pathway	WP:WP3865	4.45018e-05	4.35162	61	85	8
REAC	Interleukin-1 processing	REAC:R-HSA-448706	0.000142748	3.84543	8	247	5			REAC	MyD88 cascade initiated on plasma membrane	REAC:R-HSA-975871	2.01719e-05	4.69525	84	200	12		WP	IL-2 Signaling Pathway	WP:WP49	4.6571e-05	4.33188	42	85	7
REAC	MAPK1 (ERK2) activation	REAC:R-HSA-112411	0.000142748	3.84543	8	247	5			REAC	Toll Like Receptor 5 (TLR5) Cascade	REAC:R-HSA-168176	2.01719e-05	4.69525	84	200	12		WP	TNF related weak inducer of apoptosis (TWEAK) Signaling Pathway	WP:WP2036	4.6571e-05	4.33188	42	85	7
REAC	G alpha (q) signalling events	REAC:R-HSA-416476	0.00019833	3.70261	212	247	19			REAC	Toll Like Receptor 10 (TLR10) Cascade	REAC:R-HSA-168142	2.01719e-05	4.69525	84	200	12		WP	TGF-beta Receptor Signalling in Skeletal Dysplasias	WP:WP4816	5.06317e-05	4.29558	62	85	8
REAC	Toll Like Receptor 10 (TLR10) Cascade	REAC:R-HSA-168142	0.000202799	3.69293	84	247	12			REAC	TNF signaling	REAC:R-HSA-75893	2.65284e-05	4.57629	42	200	9		WP	T-Cell antigen Receptor (TCR) pathway during Staphylococcus aureus infection	WP:WP3863	5.06317e-05	4.29558	62	85	8
REAC	MyD88 cascade initiated on plasma membrane	REAC:R-HSA-975871	0.000202799	3.69293	84	247	12			REAC	Signaling by VEGF	REAC:R-HSA-194138	2.82439e-05	4.54908	104	200	13		WP	Lung fibrosis	WP:WP3624	5.74709e-05	4.24055	63	85	8
REAC	Toll Like Receptor 5 (TLR5) Cascade	REAC:R-HSA-168176	0.000202799	3.69293	84	247	12			REAC	Nuclear signaling by ERBB4	REAC:R-HSA-1251985	3.06253e-05	4.51392	31	200	8		WP	Brain-Derived Neurotrophic Factor (BDNF) signaling pathway	WP:WP2380	6.99014e-05	4.15551	144	85	11
REAC	Signaling by Erythropoietin	REAC:R-HSA-9006335	0.000248931	3.60392	23	247	7			REAC	Platelet activation, signaling and aggregation	REAC:R-HSA-76002	3.26355e-05	4.48631	258	200	20		WP	Selective expression of chemokine receptors during T-cell polarization	WP:WP4494	8.75995e-05	4.0575	29	85	6
REAC	Interferon gamma signaling	REAC:R-HSA-877300	0.000299278	3.52392	87	247	12			REAC	Chemokine receptors bind chemokines	REAC:R-HSA-380108	3.66586e-05	4.43582	57	200	10		WP	Corticotropin-releasing hormone signaling pathway	WP:WP2355	9.2693e-05	4.03295	91	85	9
REAC	Signaling by Leptin	REAC:R-HSA-2586552	0.000315091	3.50156	9	247	5			REAC	TAK1 activates NFkB by phosphorylation and activation of IKKs complex	REAC:R-HSA-445989	4.0179e-05	4.396	32	200	8		WP	PI3K-Akt Signaling Pathway	WP:WP4172	0.000148233	3.82906	345	85	16
REAC	Interleukin-23 signaling	REAC:R-HSA-9020933	0.000315091	3.50156	9	247	5			REAC	Signaling by FGFR1 in disease	REAC:R-HSA-5655302	4.0179e-05	4.396	32	200	8		WP	Resistin as a regulator of inflammation	WP:WP4481	0.000197039	3.70545	33	85	6
REAC	MAPK3 (ERK1) activation	REAC:R-HSA-110056	0.000315091	3.50156	9	247	5			REAC	MAPK1 (ERK2) activation	REAC:R-HSA-112411	4.9358e-05	4.30664	8	200	5		WP	IL-9 Signaling Pathway	WP:WP22	0.000220076	3.65743	19	85	5
REAC	Interleukin-6 family signaling	REAC:R-HSA-6783589	0.000344507	3.4628	24	247	7			REAC	Signaling by Overexpressed Wild-Type EGFR in Cancer	REAC:R-HSA-5638302	4.9358e-05	4.30664	8	200	5		WP	MicroRNAs in cardiomyocyte hypertrophy	WP:WP1544	0.000225464	3.64692	101	85	9
REAC	Extra-nuclear estrogen signaling	REAC:R-HSA-9009391	0.000354423	3.45048	73	247	11			REAC	Interleukin-18 signaling	REAC:R-HSA-9012546	4.9358e-05	4.30664	8	200	5		WP	Sudden Infant Death Syndrome (SIDS) Susceptibility Pathways	WP:WP706	0.000226686	3.64458	162	85	11
REAC	Signaling by ERBB2	REAC:R-HSA-1227986	0.000369194	3.43274	46	247	9			REAC	Inhibition of Signaling by Overexpressed EGFR	REAC:R-HSA-5638303	4.9358e-05	4.30664	8	200	5		WP	Role of Altered Glycolysation of MUC1 in Tumour Microenvironment	WP:WP4480	0.000241267	3.6175	9	85	4
REAC	GPCR downstream signalling	REAC:R-HSA-388396	0.00040887	3.38841	1069	247	50			REAC	Signaling by MAP2K mutants	REAC:R-HSA-9652169	5.00086e-05	4.30096	4	200	4		WP	Focal Adhesion	WP:WP306	0.000288605	3.5397	201	85	12
REAC	Interleukin-12 signaling	REAC:R-HSA-9020591	0.000447465	3.34924	47	247	9			REAC	Signaling by Erythropoietin	REAC:R-HSA-9006335	5.8788e-05	4.23071	23	200	7		WP	LTF danger signal response pathway	WP:WP4478	0.000290851	3.53633	20	85	5
REAC	Interleukin-7 signaling	REAC:R-HSA-1266695	0.000543412	3.26487	36	247	8			REAC	Signaling by EGFR in Cancer	REAC:R-HSA-1643713	5.8788e-05	4.23071	23	200	7		WP	Type II interferon signaling (IFNG)	WP:WP619	0.000398989	3.39904	37	85	6
REAC	PI3K/AKT Signaling in Cancer	REAC:R-HSA-2219528	0.000552368	3.25777	92	247	12			REAC	Transcriptional regulation by RUNX3	REAC:R-HSA-8878159	7.23111e-05	4.1408	94	200	12		WP	Type I Interferon Induction and Signaling During SARS-CoV-2 Infection	WP:WP4868	0.000549978	3.25965	39	85	6
REAC	Downstream signal transduction	REAC:R-HSA-186763	0.000629224	3.20119	26	247	7			REAC	Signaling by FLT3 ITD and TKD mutants	REAC:R-HSA-9703648	7.36291e-05	4.13295	15	200	6		WP	IL-5 Signaling Pathway	WP:WP127	0.00064125	3.19297	40	85	6
REAC	Signaling by NTRK1 (TRKA)	REAC:R-HSA-187037	0.000770879	3.11301	112	247	13			REAC	Diseases of Immune System	REAC:R-HSA-5260271	8.16782e-05	4.08789	24	200	7		WP	G13 Signaling Pathway	WP:WP524	0.00064125	3.19297	40	85	6
REAC	Generic Transcription Pathway	REAC:R-HSA-212436	0.000782032	3.10678	1221	247	54			REAC	Diseases associated with the TLR signaling cascade	REAC:R-HSA-5602358	8.16782e-05	4.08789	24	200	7		WP	IL-7 Signaling Pathway	WP:WP205	0.000953616	3.02063	25	85	5
REAC	Platelet activation, signaling and aggregation	REAC:R-HSA-76002	0.000978203	3.00957	258	247	20			REAC	Signaling by EGFR	REAC:R-HSA-177929	9.04955e-05	4.04337	48	200	9		WP	Association Between Physico-Chemical Features and Toxicity Associated Pathways	WP:WP3680	0.00132228	2.87868	68	85	7
REAC	Interferon Signaling	REAC:R-HSA-913531	0.00102744	2.98824	193	247	17			REAC	NOD1/2 Signaling Pathway	REAC:R-HSA-168638	0.000108358	3.96514	36	200	8		WP	Neuroinflammation	WP:WP4919	0.00132282	2.8785	13	85	4
REAC	FOXO-mediated transcription	REAC:R-HSA-9614085	0.0010703	2.97049	66	247	10			REAC	EGFR interacts with phospholipase C-gamma	REAC:R-HSA-212718	0.000109358	3.96115	9	200	5		WP	Small cell lung cancer	WP:WP4658	0.00169827	2.76999	98	85	8
REAC	Regulation of TLR by endogenous ligand	REAC:R-HSA-5686938	0.00129401	2.88806	19	247	6			REAC	Signaling by Leptin	REAC:R-HSA-2586552	0.000109358	3.96115	9	200	5		WP	Non-small cell lung cancer	WP:WP4255	0.00193779	2.71269	72	85	7
REAC	C-type lectin receptors (CLRs)	REAC:R-HSA-5621481	0.00131766	2.8802	136	247	14			REAC	Interleukin-9 signaling	REAC:R-HSA-8985947	0.000109358	3.96115	9	200	5		WP	Folate Metabolism	WP:WP176	0.00212399	2.67285	73	85	7
REAC	Signaling by PDGF	REAC:R-HSA-186797	0.00151526	2.81951	54	247	9			REAC	MAPK3 (ERK1) activation	REAC:R-HSA-110056	0.000109358	3.96115	9	200	5		WP	TGF-beta Signaling Pathway	WP:WP366	0.0021946	2.65864	133	85	9
REAC	NOTCH4 Intracellular Domain Regulates Transcription	REAC:R-HSA-9013695	0.00181277	2.74166	20	247	6			REAC	Interleukin-20 family signaling	REAC:R-HSA-8854691	0.000111643	3.95217	25	200	7		WP	TLR4 Signaling and Tolerance	WP:WP3851	0.00244731	2.61131	30	85	5
REAC	PIP3 activates AKT signaling	REAC:R-HSA-1257604	0.00264267	2.57796	252	247	19			REAC	Signaling by cytosolic FGFR1 fusion mutants	REAC:R-HSA-1839117	0.000115965	3.93567	16	200	6		WP	FOXP3 in COVID-19	WP:WP5063	0.00248236	2.60514	15	85	4
REAC	Signaling by FGFR1 in disease	REAC:R-HSA-5655302	0.00285774	2.54398	32	247	7			REAC	Transcriptional regulation by the AP-2 (TFAP2) family of transcription factors	REAC:R-HSA-8864260	0.00016955	3.7707	38	200	8		WP	Photodynamic therapy-induced AP-1 survival signaling.	WP:WP3611	0.00272591	2.56449	51	85	6
REAC	NF-kB is activated and signals survival	REAC:R-HSA-209560	0.00298139	2.52558	13	247	5			REAC	Generic Transcription Pathway	REAC:R-HSA-212436	0.00017105	3.76688	1221	200	48		WP	Vitamin B12 Metabolism	WP:WP1533	0.00341307	2.46686	53	85	6
REAC	RAF-independent MAPK1/3 activation	REAC:R-HSA-112409	0.00335576	2.47421	22	247	6			REAC	Signaling by PDGFRA extracellular domain mutants	REAC:R-HSA-9673770	0.000215373	3.66681	10	200	5		WP	Regulatory circuits of the STAT3 signaling pathway	WP:WP4538	0.00357903	2.44624	79	85	7
REAC	Interleukin-15 signaling	REAC:R-HSA-8983432	0.00454996	2.34199	14	247	5			REAC	Signaling by PDGFRA transmembrane, juxtamembrane and kinase domain mutants	REAC:R-HSA-9673767	0.000215373	3.66681	10	200	5		WP	RANKL/RANK (Receptor activator of NFKB (ligand)) Signaling Pathway	WP:WP2018	0.00423327	2.37332	55	85	6
REAC	Prolonged ERK activation events	REAC:R-HSA-169893	0.00454996	2.34199	14	247	5			REAC	Nucleotide-binding domain, leucine rich repeat containing receptor (NLR) signaling pathways	REAC:R-HSA-168643	0.00030617	3.51404	55	200	9		WP	Alpha 6 Beta 4 signaling pathway	WP:WP244	0.00533436	2.27292	35	85	5
REAC	Signalling to STAT3	REAC:R-HSA-198745	0.00513436	2.28951	3	247	3			REAC	Peptide ligand-binding receptors	REAC:R-HSA-375276	0.000323477	3.49016	195	200	16		WP	Activation of NLRP3 Inflammasome by SARS-CoV-2	WP:WP4876	0.0062424	2.20465	7	85	3
REAC	PLC-gamma1 signalling	REAC:R-HSA-167021	0.00513436	2.28951	3	247	3			REAC	TICAM1, RIP1-mediated IKK complex recruitment	REAC:R-HSA-168927	0.000374779	3.42623	19	200	6		WP	Kit receptor signaling pathway	WP:WP304	0.00699024	2.15551	60	85	6
REAC	Estrogen-dependent nuclear events downstream of ESR-membrane signaling	REAC:R-HSA-9634638	0.00582155	2.23496	24	247	6			REAC	Interleukin-6 signaling	REAC:R-HSA-1059683	0.000388818	3.41025	11	200	5		WP	Neovascularisation processes	WP:WP4331	0.00703743	2.15259	37	85	5
REAC	FLT3 Signaling	REAC:R-HSA-9607240	0.0065466	2.18398	36	247	7			REAC	Frs2-mediated activation	REAC:R-HSA-170968	0.000388818	3.41025	11	200	5		WP	Pancreatic adenocarcinoma pathway	WP:WP4263	0.00722517	2.14115	88	85	7
REAC	RUNX3 regulates p14-ARF	REAC:R-HSA-8951936	0.00767052	2.11518	8	247	4			REAC	TICAM1,TRAF6-dependent induction of TAK1 complex	REAC:R-HSA-9014325	0.000388818	3.41025	11	200	5		WP	STING pathway in Kawasaki-like disease and COVID-19	WP:WP4961	0.010338	1.98556	21	85	4
REAC	p75NTR signals via NF-kB	REAC:R-HSA-193639	0.00955533	2.01975	16	247	5			REAC	GRB2 events in EGFR signaling	REAC:R-HSA-179812	0.000388818	3.41025	11	200	5		WP	PDGF Pathway	WP:WP2526	0.010346	1.98523	40	85	5
REAC	VEGFR2 mediated cell proliferation	REAC:R-HSA-5218921	0.00955533	2.01975	16	247	5			REAC	Nervous system development	REAC:R-HSA-9675108	0.000423807	3.37283	574	200	29		WP	Nucleotide-binding Oligomerization Domain (NOD) pathway	WP:WP1433	0.0116796	1.93257	41	85	5
REAC	Signaling by cytosolic FGFR1 fusion mutants	REAC:R-HSA-1839117	0.00955533	2.01975	16	247	5			REAC	Developmental Biology	REAC:R-HSA-1266738	0.000550147	3.25952	1116	200	44		WP	VEGFA-VEGFR2 Signaling Pathway	WP:WP3888	0.0120787	1.91798	437	85	15
REAC	Gastrin-CREB signalling pathway via PKC and MAPK	REAC:R-HSA-881907	0.00955533	2.01975	16	247	5			REAC	VEGFA-VEGFR2 Pathway	REAC:R-HSA-4420097	0.0005794	3.23702	94	200	11		WP	Supression of HMGB1 mediated inflammation by THBD	WP:WP4479	0.0147395	1.83152	9	85	3
REAC	RNA Polymerase II Transcription	REAC:R-HSA-73857	0.0125782	1.90038	1342	247	54			REAC	Signaling by MET	REAC:R-HSA-6806834	0.000593903	3.22628	76	200	10		WP	ApoE and miR-146 in inflammation and atherosclerosis	WP:WP3926	0.0147395	1.83152	9	85	3
REAC	PI3K/AKT activation	REAC:R-HSA-198203	0.0135549	1.8679	9	247	4			REAC	Erythropoietin activates Phosphoinositide-3-kinase (PI3K)	REAC:R-HSA-9027276	0.000656365	3.18285	12	200	5		WP	IL-6 signaling pathway	WP:WP364	0.0147403	1.83149	43	85	5
REAC	Nucleotide-binding domain, leucine rich repeat containing receptor (NLR) signaling pathways	REAC:R-HSA-168643	0.014931	1.82591	55	247	8			REAC	SHC1 events in EGFR signaling	REAC:R-HSA-180336	0.000656365	3.18285	12	200	5		WP	EBV LMP1 signaling	WP:WP262	0.0178886	1.74742	24	85	4
REAC	Neutrophil degranulation	REAC:R-HSA-6798695	0.0182761	1.73812	476	247	26			REAC	C-type lectin receptors (CLRs)	REAC:R-HSA-5621481	0.000659017	3.1811	136	200	13		WP	Cytosolic DNA-sensing pathway	WP:WP4655	0.022818	1.64172	74	85	6
REAC	Apoptosis	REAC:R-HSA-109581	0.022122	1.65518	174	247	14			REAC	Fc epsilon receptor (FCERI) signaling	REAC:R-HSA-2454202	0.000684495	3.16463	182	200	15		WP	EPO Receptor Signaling	WP:WP581	0.0247405	1.60659	26	85	4
REAC	Activation of the AP-1 family of transcription factors	REAC:R-HSA-450341	0.0221793	1.65405	10	247	4			REAC	Signaling by FGFR3	REAC:R-HSA-5654741	0.000699014	3.15551	32	200	7		WP	Aryl Hydrocarbon Receptor Netpath	WP:WP2586	0.025091	1.60048	48	85	5
REAC	MyD88 deficiency (TLR2/4)	REAC:R-HSA-5602498	0.0221793	1.65405	10	247	4			REAC	Interleukin-37 signaling	REAC:R-HSA-9008059	0.00072634	3.13886	21	200	6		WP	NO/cGMP/PKG mediated Neuroprotection	WP:WP4008	0.025091	1.60048	48	85	5
REAC	Transcriptional regulation by RUNX3	REAC:R-HSA-8878159	0.025939	1.58605	94	247	10			REAC	Signaling by NTRK2 (TRKB)	REAC:R-HSA-9006115	0.00072634	3.13886	21	200	6		WP	Extracellular vesicles in the crosstalk of cardiac cells	WP:WP4300	0.0287956	1.54067	27	85	4
REAC	Signalling to ERKs	REAC:R-HSA-187687	0.0277814	1.55625	31	247	6			REAC	Negative feedback regulation of MAPK pathway	REAC:R-HSA-5674499	0.000728144	3.13778	6	200	4		WP	Nuclear Receptors Meta-Pathway	WP:WP2882	0.0302654	1.51905	321	85	12
REAC	CD209 (DC-SIGN) signaling	REAC:R-HSA-5621575	0.0314266	1.5027	20	247	5			REAC	Regulation of TNFR1 signaling	REAC:R-HSA-5357905	0.00087316	3.05891	33	200	7		WP	Regulation of Actin Cytoskeleton	WP:WP51	0.0337793	1.47135	149	85	8
REAC	TAK1 activates NFkB by phosphorylation and activation of IKKs complex	REAC:R-HSA-445989	0.033533	1.47453	32	247	6			REAC	IKK complex recruitment mediated by RIP1	REAC:R-HSA-937041	0.000983134	3.00739	22	200	6		WP	DNA Damage Response (only ATM dependent)	WP:WP710	0.0370217	1.43154	114	85	7
REAC	p75 NTR receptor-mediated signalling	REAC:R-HSA-193704	0.0339482	1.46918	97	247	10			REAC	PI3K events in ERBB2 signaling	REAC:R-HSA-1963642	0.00105031	2.97868	13	200	5		WP	IL-10 Anti-inflammatory Signaling Pathway	WP:WP4495	0.0376716	1.42399	12	85	3
REAC	CLEC7A (Dectin-1) signaling	REAC:R-HSA-5607764	0.0339482	1.46918	97	247	10			REAC	PI-3K cascade:FGFR3	REAC:R-HSA-5654710	0.00105031	2.97868	13	200	5		WP	PDGFR-beta pathway	WP:WP3972	0.0383087	1.4167	29	85	4
REAC	Regulation of gene expression by Hypoxia-inducible Factor	REAC:R-HSA-1234158	0.0342178	1.46575	11	247	4			REAC	activated TAK1 mediates p38 MAPK activation	REAC:R-HSA-450302	0.00130937	2.88294	23	200	6		WP	T-Cell Receptor and Co-stimulatory Signaling	WP:WP2583	0.0383087	1.4167	29	85	4
REAC	IRAK4 deficiency (TLR2/4)	REAC:R-HSA-5603041	0.0342178	1.46575	11	247	4			REAC	Signaling by FGFR4	REAC:R-HSA-5654743	0.00133124	2.87574	35	200	7		WP	RAS and Bradykinin pathways in COVID-19	WP:WP4969	0.0383087	1.4167	29	85	4
REAC	Fc epsilon receptor (FCERI) signaling	REAC:R-HSA-2454202	0.036061	1.44296	182	247	14			REAC	Class A/1 (Rhodopsin-like receptors)	REAC:R-HSA-373076	0.00147514	2.83117	328	200	20		WP	Extracellular vesicle-mediated signaling in recipient cells	WP:WP2870	0.0438258	1.35827	30	85	4
REAC	MAP kinase activation	REAC:R-HSA-450294	0.0404657	1.39291	63	247	8			REAC	Prolonged ERK activation events	REAC:R-HSA-169893	0.00160888	2.79348	14	200	5		WP	EGFR Tyrosine Kinase Inhibitor Resistance	WP:WP4806	0.0457841	1.33929	84	85	6
REAC	Signaling by NOTCH	REAC:R-HSA-157118	0.0442	1.35458	233	247	16			REAC	FLT3 Signaling	REAC:R-HSA-9607240	0.00162642	2.78877	36	200	7		WP	Interferon type I signaling pathways	WP:WP585	0.047931	1.31938	55	85	5
REAC	Programmed Cell Death	REAC:R-HSA-5357801	0.0455341	1.34166	186	247	14			REAC	Erythropoietin activates STAT5	REAC:R-HSA-9027283	0.00167394	2.77626	7	200	4		WP	Pathogenic Escherichia coli infection	WP:WP2272	0.047931	1.31938	55	85	5
REAC	Leukotriene receptors	REAC:R-HSA-391906	0.0495902	1.3046	5	247	3			REAC	RHO GTPases Activate NADPH Oxidases	REAC:R-HSA-5668599	0.00171861	2.76482	24	200	6
REAC	RUNX3 regulates BCL2L11 (BIM) transcription	REAC:R-HSA-8952158	0.0495902	1.3046	5	247	3			REAC	TRAF6 mediated NF-kB activation	REAC:R-HSA-933542	0.00171861	2.76482	24	200	6
WP	Chemokine signaling pathway	WP:WP3929	6.99905e-22	21.155	165	238	39			REAC	Interleukin-6 family signaling	REAC:R-HSA-6783589	0.00171861	2.76482	24	200	6
WP	Hepatitis B infection	WP:WP4666	6.15066e-21	20.2111	154	238	37			REAC	IRAK2 mediated activation of TAK1 complex upon TLR7/8 or 9 stimulation	REAC:R-HSA-975163	0.00237651	2.62406	15	200	5
WP	Regulation of toll-like receptor signaling pathway	WP:WP1449	7.42898e-21	20.1291	145	238	36			REAC	TRAF6-mediated induction of TAK1 complex within TLR4 complex	REAC:R-HSA-937072	0.00237651	2.62406	15	200	5
WP	Thymic Stromal LymphoPoietin (TSLP) Signaling Pathway	WP:WP2203	1.29844e-20	19.8866	47	238	23			REAC	PI-3K cascade:FGFR1	REAC:R-HSA-5654689	0.00237651	2.62406	15	200	5
WP	AGE/RAGE pathway	WP:WP2324	1.97329e-20	19.7048	66	238	26			REAC	RNA Polymerase II Transcription	REAC:R-HSA-73857	0.00257249	2.58965	1342	200	48
WP	Toll-like Receptor Signaling Pathway	WP:WP75	2.33936e-20	19.6309	104	238	31			REAC	IKBKB deficiency causes SCID	REAC:R-HSA-5602636	0.00269564	2.56934	3	200	3
WP	IL-4 Signaling Pathway	WP:WP395	4.71676e-20	19.3264	55	238	24			REAC	IKBKG deficiency causes anhidrotic ectodermal dysplasia with immunodeficiency (EDA-ID) (via TLR)	REAC:R-HSA-5603027	0.00269564	2.56934	3	200	3
WP	Gastrin Signaling Pathway	WP:WP4659	6.43221e-18	17.1916	114	238	30			REAC	Interleukin receptor SHC signaling	REAC:R-HSA-912526	0.00284878	2.54534	26	200	6
WP	Oncostatin M Signaling Pathway	WP:WP2374	8.7254e-18	17.0592	66	238	24			REAC	Constitutive Signaling by AKT1 E17K in Cancer	REAC:R-HSA-5674400	0.00284878	2.54534	26	200	6
WP	Non-genomic actions of 1,25 dihydroxyvitamin D3	WP:WP4341	4.38786e-17	16.3577	70	238	24			REAC	Signaling by NTRK1 (TRKA)	REAC:R-HSA-187037	0.00327847	2.48433	112	200	11
WP	IL-18 signaling pathway	WP:WP4754	1.3854e-16	15.8584	279	238	43			REAC	Signaling by FGFR1	REAC:R-HSA-5654736	0.00340797	2.4675	40	200	7
WP	Lung fibrosis	WP:WP3624	9.21625e-16	15.0354	63	238	22			REAC	FLT3 signaling in disease	REAC:R-HSA-9682385	0.00360565	2.44302	27	200	6
WP	Development and heterogeneity of the ILC family	WP:WP3893	9.84715e-16	15.0067	32	238	17			REAC	Signaling by FGFR in disease	REAC:R-HSA-1226099	0.00368406	2.43367	56	200	8
WP	Viral Acute Myocarditis	WP:WP4298	9.88221e-16	15.0051	87	238	25			REAC	G alpha (q) signalling events	REAC:R-HSA-416476	0.00448207	2.34852	212	200	15
WP	T-Cell antigen Receptor (TCR) Signaling Pathway	WP:WP69	3.28032e-15	14.4841	91	238	25			REAC	RIP-mediated NFkB activation via ZBP1	REAC:R-HSA-1810476	0.00474887	2.32341	17	200	5
WP	Neovascularisation processes	WP:WP4331	2.40601e-14	13.6187	37	238	17			REAC	PI-3K cascade:FGFR4	REAC:R-HSA-5654720	0.00474887	2.32341	17	200	5
WP	Selective expression of chemokine receptors during T-cell polarization	WP:WP4494	1.59644e-13	12.7968	29	238	15			REAC	FOXO-mediated transcription of cell cycle genes	REAC:R-HSA-9617828	0.00474887	2.32341	17	200	5
WP	Photodynamic therapy-induced NF-kB survival signaling	WP:WP3617	2.14603e-13	12.6684	35	238	16			REAC	Signaling by FLT3 fusion proteins	REAC:R-HSA-9703465	0.00474887	2.32341	17	200	5
WP	Allograft Rejection	WP:WP2328	2.24052e-13	12.6497	88	238	23			REAC	Death Receptor Signalling	REAC:R-HSA-73887	0.00517879	2.28577	140	200	12
WP	RANKL/RANK (Receptor activator of NFKB (ligand)) Signaling Pathway	WP:WP2018	2.31959e-13	12.6346	55	238	19			REAC	Axon guidance	REAC:R-HSA-422475	0.00518055	2.28562	549	200	26
WP	TNF related weak inducer of apoptosis (TWEAK) Signaling Pathway	WP:WP2036	3.34775e-13	12.4752	42	238	17			REAC	Extracellular matrix organization	REAC:R-HSA-1474244	0.00527333	2.27792	298	200	18
WP	Cytokines and Inflammatory Response	WP:WP530	7.0862e-13	12.1496	26	238	14			REAC	Transcriptional regulation by RUNX2	REAC:R-HSA-8878166	0.00541797	2.26616	118	200	11
WP	IL17 signaling pathway	WP:WP2112	1.07033e-12	11.9705	32	238	15			REAC	DDX58/IFIH1-mediated induction of interferon-alpha/beta	REAC:R-HSA-168928	0.00604409	2.21867	78	200	9
WP	Leptin signaling pathway	WP:WP2034	1.19083e-12	11.9241	76	238	21			REAC	PI-3K cascade:FGFR2	REAC:R-HSA-5654695	0.00647517	2.18875	18	200	5
WP	Spinal Cord Injury	WP:WP2431	2.52954e-12	11.597	118	238	25			REAC	Signaling by PDGFR in disease	REAC:R-HSA-9671555	0.00647517	2.18875	18	200	5
WP	T-Cell antigen Receptor (TCR) pathway during Staphylococcus aureus infection	WP:WP3863	2.90948e-12	11.5362	62	238	19			REAC	Downstream signaling of activated FGFR3	REAC:R-HSA-5654708	0.00647517	2.18875	18	200	5
WP	Brain-Derived Neurotrophic Factor (BDNF) signaling pathway	WP:WP2380	5.17549e-12	11.286	144	238	27			REAC	Transcriptional activity of SMAD2/SMAD3:SMAD4 heterotrimer	REAC:R-HSA-2173793	0.00657236	2.18228	44	200	7
WP	IL-3 Signaling Pathway	WP:WP286	7.0192e-12	11.1537	49	238	17			REAC	RUNX2 regulates bone development	REAC:R-HSA-8941326	0.00689999	2.16115	30	200	6
WP	EGFR Tyrosine Kinase Inhibitor Resistance	WP:WP4806	1.07181e-11	10.9699	84	238	21			REAC	Insulin receptor signalling cascade	REAC:R-HSA-74751	0.0076601	2.11577	45	200	7
WP	Prolactin Signaling Pathway	WP:WP2037	1.49756e-11	10.8246	76	238	20			REAC	Interleukin-1 signaling	REAC:R-HSA-9020702	0.00794837	2.09972	101	200	10
WP	SARS-CoV-2 Innate Immunity Evasion and Cell-specific immune response	WP:WP5039	1.92472e-11	10.7156	68	238	19			REAC	Signalling to ERKs	REAC:R-HSA-187687	0.00842281	2.07454	31	200	6
WP	Resistin as a regulator of inflammation	WP:WP4481	4.93558e-11	10.3067	33	238	14			REAC	CD28 co-stimulation	REAC:R-HSA-389356	0.00842281	2.07454	31	200	6
WP	PI3K-Akt Signaling Pathway	WP:WP4172	5.38185e-11	10.2691	345	238	40			REAC	Signaling by ERBB2	REAC:R-HSA-1227986	0.00889229	2.05099	46	200	7
WP	miRNAs involvement in the immune response in sepsis	WP:WP4329	5.692e-11	10.2447	63	238	18			REAC	Cytosolic sensors of pathogen-associated DNA	REAC:R-HSA-1834949	0.00897403	2.04701	63	200	8
WP	Hepatitis C and Hepatocellular Carcinoma	WP:WP3646	1.70758e-10	9.76762	50	238	16			REAC	Hemostasis	REAC:R-HSA-109582	0.00942558	2.02569	673	200	29
WP	IL-6 signaling pathway	WP:WP364	2.10471e-10	9.67681	43	238	15			REAC	STAT5 activation downstream of FLT3 ITD mutants	REAC:R-HSA-9702518	0.00960617	2.01745	10	200	4
WP	Pancreatic adenocarcinoma pathway	WP:WP4263	3.01775e-10	9.52032	88	238	20			REAC	Interleukin-21 signaling	REAC:R-HSA-9020958	0.00960617	2.01745	10	200	4
WP	Kit receptor signaling pathway	WP:WP304	3.07046e-10	9.5128	60	238	17			REAC	Apoptosis	REAC:R-HSA-109581	0.0099026	2.00425	174	200	13
WP	COVID-19 Adverse Outcome Pathway	WP:WP4891	3.31675e-10	9.47929	15	238	10			REAC	SMAD2/SMAD3:SMAD4 heterotrimer regulates transcription	REAC:R-HSA-2173796	0.0102052	1.99118	32	200	6
WP	Netrin-UNC5B signaling Pathway	WP:WP4747	3.39763e-10	9.46882	52	238	16			REAC	Biosynthesis of DPAn-3 SPMs	REAC:R-HSA-9025094	0.0106325	1.97336	4	200	3
WP	IL-7 Signaling Pathway	WP:WP205	4.16244e-10	9.38065	25	238	12			REAC	SMAD2/3 Phosphorylation Motif Mutants in Cancer	REAC:R-HSA-3304356	0.0106325	1.97336	4	200	3
WP	IL1 and megakaryocytes in obesity	WP:WP2865	4.16244e-10	9.38065	25	238	12			REAC	TGFBR1 KD Mutants in Cancer	REAC:R-HSA-3656532	0.0106325	1.97336	4	200	3
WP	LTF danger signal response pathway	WP:WP4478	5.0057e-10	9.30054	20	238	11			REAC	Biosynthesis of DPA-derived SPMs	REAC:R-HSA-9018683	0.0106325	1.97336	4	200	3
WP	Corticotropin-releasing hormone signaling pathway	WP:WP2355	5.89713e-10	9.22936	91	238	20			REAC	FOXO-mediated transcription	REAC:R-HSA-9614085	0.0126817	1.89682	66	200	8
WP	Fibrin Complement Receptor 3 Signaling Pathway	WP:WP4136	2.47466e-09	8.60648	42	238	14			REAC	Netrin-1 signaling	REAC:R-HSA-373752	0.0136057	1.86628	49	200	7
WP	IL-2 Signaling Pathway	WP:WP49	2.47466e-09	8.60648	42	238	14			REAC	Regulation of signaling by CBL	REAC:R-HSA-912631	0.0146867	1.83308	21	200	5
WP	PDGFR-beta pathway	WP:WP3972	3.71375e-09	8.43019	29	238	12			REAC	ZBP1(DAI) mediated induction of type I IFNs	REAC:R-HSA-1606322	0.0146867	1.83308	21	200	5
WP	CAMKK2 Pathway	WP:WP4874	4.17949e-09	8.37888	36	238	13			REAC	Signaling by ERBB2 KD Mutants	REAC:R-HSA-9664565	0.0146867	1.83308	21	200	5
WP	MicroRNAs in cardiomyocyte hypertrophy	WP:WP1544	4.55719e-09	8.3413	101	238	20			REAC	GPVI-mediated activation cascade	REAC:R-HSA-114604	0.0174398	1.75846	35	200	6
WP	VEGFA-VEGFR2 Signaling Pathway	WP:WP3888	6.90025e-09	8.16113	437	238	42			REAC	Signaling by PTK6	REAC:R-HSA-8848021	0.0177633	1.75048	51	200	7
WP	Senescence and Autophagy in Cancer	WP:WP615	1.64485e-08	7.78387	108	238	20			REAC	Signaling by Non-Receptor Tyrosine Kinases	REAC:R-HSA-9006927	0.0177633	1.75048	51	200	7
WP	Interactions between immune cells and microRNAs in tumor microenvironment	WP:WP4559	1.94547e-08	7.71098	40	238	13			REAC	Signaling by ERBB2 in Cancer	REAC:R-HSA-1227990	0.0187172	1.72776	22	200	5
WP	IL-1 signaling pathway	WP:WP195	2.06734e-08	7.68459	57	238	15			REAC	JNK (c-Jun kinases) phosphorylation and activation mediated by activated human TAK1	REAC:R-HSA-450321	0.0187172	1.72776	22	200	5
WP	B Cell Receptor Signaling Pathway	WP:WP23	2.1439e-08	7.66879	98	238	19			REAC	Downstream signaling of activated FGFR1	REAC:R-HSA-5654687	0.0187172	1.72776	22	200	5
WP	TGF-beta Receptor Signaling	WP:WP560	2.71124e-08	7.56683	58	238	15			REAC	Downstream signaling of activated FGFR4	REAC:R-HSA-5654716	0.0187172	1.72776	22	200	5
WP	Signal transduction through IL1R	WP:WP4496	5.04828e-08	7.29686	35	238	12			REAC	Programmed Cell Death	REAC:R-HSA-5357801	0.0199379	1.70032	186	200	13
WP	Focal Adhesion-PI3K-Akt-mTOR-signaling pathway	WP:WP3932	7.25586e-08	7.13931	309	238	33			REAC	Interleukin-7 signaling	REAC:R-HSA-1266695	0.0206025	1.68608	36	200	6
WP	Interleukin-11 Signaling Pathway	WP:WP2332	7.50284e-08	7.12477	44	238	13			REAC	Signaling by TGF-beta Receptor Complex	REAC:R-HSA-170834	0.0216769	1.664	71	200	8
WP	TGF-beta Receptor Signalling in Skeletal Dysplasias	WP:WP4816	7.57813e-08	7.12044	62	238	15			REAC	Interleukin-2 signaling	REAC:R-HSA-9020558	0.0219817	1.65794	12	200	4
WP	Non-small cell lung cancer	WP:WP4255	7.69286e-08	7.11391	72	238	16			REAC	Negative regulation of FGFR3 signaling	REAC:R-HSA-5654732	0.0235527	1.62796	23	200	5
WP	T-Cell Receptor and Co-stimulatory Signaling	WP:WP2583	8.02039e-08	7.0958	29	238	11			REAC	RUNX2 regulates osteoblast differentiation	REAC:R-HSA-8940973	0.0235527	1.62796	23	200	5
WP	Type II interferon signaling (IFNG)	WP:WP619	1.05972e-07	6.97481	37	238	12			REAC	Downstream signaling of activated FGFR2	REAC:R-HSA-5654696	0.0235527	1.62796	23	200	5
WP	Control of immune tolerance by vasoactive intestinal peptide	WP:WP4484	1.54289e-07	6.81167	13	238	8			REAC	Loss of Function of TGFBR1 in Cancer	REAC:R-HSA-3656534	0.0262118	1.5815	5	200	3
WP	EBV LMP1 signaling	WP:WP262	1.68668e-07	6.77297	24	238	10			REAC	Loss of Function of SMAD2/3 in Cancer	REAC:R-HSA-3304349	0.0262118	1.5815	5	200	3
WP	Angiogenesis	WP:WP1539	1.68668e-07	6.77297	24	238	10			REAC	Biosynthesis of EPA-derived SPMs	REAC:R-HSA-9018679	0.0262118	1.5815	5	200	3
WP	Cardiac Hypertrophic Response	WP:WP2795	2.3641e-07	6.62633	57	238	14			REAC	Downregulation of TGF-beta receptor signaling	REAC:R-HSA-2173788	0.0292985	1.53315	24	200	5
WP	Toll-like Receptor Signaling related to MyD88	WP:WP3858	2.75091e-07	6.56052	32	238	11			REAC	Signaling by EGFRvIII in Cancer	REAC:R-HSA-5637812	0.0312845	1.50467	13	200	4
WP	IL-9 Signaling Pathway	WP:WP22	2.93336e-07	6.53264	19	238	9			REAC	Constitutive Signaling by EGFRvIII	REAC:R-HSA-5637810	0.0312845	1.50467	13	200	4
WP	IL-5 Signaling Pathway	WP:WP127	2.93866e-07	6.53185	40	238	12			REAC	TNFR1-induced proapoptotic signaling	REAC:R-HSA-5357786	0.0312845	1.50467	13	200	4
WP	RAC1/PAK1/p38/MMP2 Pathway	WP:WP3303	3.79234e-07	6.42109	69	238	15			REAC	Gene expression (Transcription)	REAC:R-HSA-74160	0.0316197	1.50004	1476	200	48
WP	Hematopoietic Stem Cell Differentiation	WP:WP2849	7.76427e-07	6.1099	62	238	14			REAC	CLEC7A (Dectin-1) signaling	REAC:R-HSA-5607764	0.0348165	1.45821	97	200	9
WP	EGF/EGFR Signaling Pathway	WP:WP437	1.00319e-06	5.99862	163	238	22			REAC	TCR signaling	REAC:R-HSA-202403	0.0352351	1.45302	120	200	10
WP	RAS and Bradykinin pathways in COVID-19	WP:WP4969	1.49923e-06	5.82413	29	238	10			REAC	Downstream TCR signaling	REAC:R-HSA-202424	0.037722	1.42341	98	200	9
WP	Interferon type I signaling pathways	WP:WP585	1.54075e-06	5.81227	55	238	13			REAC	Signaling by RAF1 mutants	REAC:R-HSA-9656223	0.0381357	1.41867	40	200	6
WP	ErbB Signaling Pathway	WP:WP673	2.41895e-06	5.61637	90	238	16			REAC	MET promotes cell motility	REAC:R-HSA-8875878	0.0381357	1.41867	40	200	6
WP	Platelet-mediated interactions with vascular and circulating cells	WP:WP4462	2.61186e-06	5.58305	17	238	8			REAC	Signaling by ERBB2 ECD mutants	REAC:R-HSA-9665348	0.0431547	1.36497	14	200	4
WP	Regulatory circuits of the STAT3 signaling pathway	WP:WP4538	2.72352e-06	5.56487	79	238	15			REAC	IRAK1 recruits IKK complex upon TLR7/8 or 9 stimulation	REAC:R-HSA-975144	0.0431547	1.36497	14	200	4
WP	Type I Interferon Induction and Signaling During SARS-CoV-2 Infection	WP:WP4868	2.93982e-06	5.53168	39	238	11			REAC	IRAK1 recruits IKK complex	REAC:R-HSA-937039	0.0431547	1.36497	14	200	4
WP	MET in type 1 papillary renal cell carcinoma	WP:WP4205	3.08018e-06	5.51142	58	238	13			REAC	AKT phosphorylates targets in the cytosol	REAC:R-HSA-198323	0.0431547	1.36497	14	200	4
WP	PDGF Pathway	WP:WP2526	3.94346e-06	5.40412	40	238	11			REAC	Prolactin receptor signaling	REAC:R-HSA-1170546	0.0431547	1.36497	14	200	4
WP	Insulin Signaling	WP:WP481	4.17898e-06	5.37893	161	238	21			REAC	Negative regulation of FGFR1 signaling	REAC:R-HSA-5654726	0.0439756	1.35679	26	200	5
WP	TCA Cycle Nutrient Utilization and Invasiveness of Ovarian Cancer	WP:WP2868	4.75037e-06	5.32327	5	238	5			REAC	Signaling by TGFB family members	REAC:R-HSA-9006936	0.0441463	1.35511	100	200	9
WP	Signaling Pathways in Glioblastoma	WP:WP2261	5.49234e-06	5.26024	83	238	15			WP	Hepatitis B infection	WP:WP4666	5.23451e-27	26.2811	154	190	39
WP	Epithelial to mesenchymal transition in colorectal cancer	WP:WP4239	5.81024e-06	5.23581	164	238	21			WP	Gastrin Signaling Pathway	WP:WP4659	6.52525e-26	25.1854	114	190	34
WP	EPO Receptor Signaling	WP:WP581	8.17837e-06	5.08733	26	238	9			WP	Leptin signaling pathway	WP:WP2034	1.43937e-22	21.8418	76	190	27
WP	Chromosomal and microsatellite instability in colorectal cancer	WP:WP4216	8.69421e-06	5.06077	74	238	14			WP	PI3K-Akt Signaling Pathway	WP:WP4172	3.00478e-22	21.5222	345	190	49
WP	Ras Signaling	WP:WP4223	9.55242e-06	5.01989	184	238	22			WP	Thymic Stromal LymphoPoietin (TSLP) Signaling Pathway	WP:WP2203	2.37937e-21	20.6235	47	190	22
WP	ApoE and miR-146 in inflammation and atherosclerosis	WP:WP3926	1.13574e-05	4.94472	9	238	6			WP	EGFR Tyrosine Kinase Inhibitor Resistance	WP:WP4806	3.20525e-21	20.4941	84	190	27
WP	Alpha 6 Beta 4 signaling pathway	WP:WP244	1.1633e-05	4.93431	35	238	10			WP	TGF-beta Signaling Pathway	WP:WP366	4.71997e-21	20.3261	133	190	32
WP	Extracellular vesicles in the crosstalk of cardiac cells	WP:WP4300	1.19338e-05	4.92322	27	238	9			WP	Lung fibrosis	WP:WP3624	9.2274e-21	20.0349	63	190	24
WP	Nonalcoholic fatty liver disease	WP:WP4396	1.6858e-05	4.77319	159	238	20			WP	Toll-like Receptor Signaling Pathway	WP:WP75	1.11356e-19	18.9533	104	190	28
WP	Adipogenesis	WP:WP236	1.9298e-05	4.71449	131	238	18			WP	RANKL/RANK (Receptor activator of NFKB (ligand)) Signaling Pathway	WP:WP2018	1.75552e-19	18.7556	55	190	22
WP	FOXP3 in COVID-19	WP:WP5063	2.33007e-05	4.63263	15	238	7			WP	Pancreatic adenocarcinoma pathway	WP:WP4263	2.56227e-19	18.5914	88	190	26
WP	Somatroph axis (GH) and its relationship to dietary restriction and aging	WP:WP4186	2.77699e-05	4.55643	6	238	5			WP	RAC1/PAK1/p38/MMP2 Pathway	WP:WP3303	2.7416e-18	17.562	69	190	23
WP	PI3K/AKT/mTOR - VitD3 Signalling	WP:WP4141	2.99628e-05	4.52342	22	238	8			WP	Viral Acute Myocarditis	WP:WP4298	3.43789e-18	17.4637	87	190	25
WP	Vitamin D in inflammatory diseases	WP:WP4482	2.99628e-05	4.52342	22	238	8			WP	Regulation of toll-like receptor signaling pathway	WP:WP1449	1.3277e-17	16.8769	145	190	30
WP	Translation inhibitors in chronically activated PDGFRA cells	WP:WP4566	3.08421e-05	4.51086	48	238	11			WP	IL17 signaling pathway	WP:WP2112	1.87105e-17	16.7279	32	190	17
WP	Aryl Hydrocarbon Receptor Pathway	WP:WP2873	3.08421e-05	4.51086	48	238	11			WP	IL-5 Signaling Pathway	WP:WP127	7.38431e-17	16.1317	40	190	18
WP	MAPK Signaling Pathway	WP:WP382	3.73574e-05	4.42762	249	238	25			WP	Bladder Cancer	WP:WP2828	1.28786e-16	15.8901	41	190	18
WP	Focal Adhesion	WP:WP306	4.64561e-05	4.33296	201	238	22			WP	ErbB Signaling Pathway	WP:WP673	1.4512e-16	15.8383	90	190	24
WP	Photodynamic therapy-induced AP-1 survival signaling.	WP:WP3611	5.97991e-05	4.22331	51	238	11			WP	MicroRNAs in cardiomyocyte hypertrophy	WP:WP1544	1.90138e-16	15.7209	101	190	25
WP	Pathways Regulating Hippo Signaling	WP:WP4540	6.20258e-05	4.20743	99	238	15			WP	AGE/RAGE pathway	WP:WP2324	4.12329e-16	15.3848	66	190	21
WP	Cells and Molecules involved in local acute inflammatory response	WP:WP4493	6.67124e-05	4.17579	17	238	7			WP	Interleukin-11 Signaling Pathway	WP:WP2332	6.14358e-16	15.2116	44	190	18
WP	Peptide GPCRs	WP:WP24	7.67616e-05	4.11486	75	238	13			WP	Focal Adhesion-PI3K-Akt-mTOR-signaling pathway	WP:WP3932	2.26421e-15	14.6451	309	190	39
WP	Regucalcin in proximal tubule epithelial kidney cells	WP:WP4838	8.32319e-05	4.07971	33	238	9			WP	IL-4 Signaling Pathway	WP:WP395	3.07406e-15	14.5123	55	190	19
WP	Ebola Virus Pathway on Host	WP:WP4217	9.03289e-05	4.04417	130	238	17			WP	IL-18 signaling pathway	WP:WP4754	3.28972e-15	14.4828	279	190	37
WP	Hypothesized Pathways in Pathogenesis of Cardiovascular Disease	WP:WP3668	9.33651e-05	4.02982	25	238	8			WP	Photodynamic therapy-induced NF-kB survival signaling	WP:WP3617	5.32991e-15	14.2733	35	190	16
WP	Relationship between inflammation, COX-2 and EGFR	WP:WP4483	9.33651e-05	4.02982	25	238	8			WP	IL-3 Signaling Pathway	WP:WP286	6.1805e-15	14.209	49	190	18
WP	Neural Crest Cell Migration in Cancer	WP:WP4565	9.73275e-05	4.01176	43	238	10			WP	Cardiac Hypertrophic Response	WP:WP2795	6.68084e-15	14.1752	57	190	19
WP	Endochondral Ossification with Skeletal Dysplasias	WP:WP4808	0.000105337	3.97742	65	238	12			WP	TNF related weak inducer of apoptosis (TWEAK) Signaling Pathway	WP:WP2036	6.76491e-15	14.1697	42	190	17
WP	Endochondral Ossification	WP:WP474	0.000105337	3.97742	65	238	12			WP	Prolactin Signaling Pathway	WP:WP2037	1.08303e-14	13.9654	76	190	21
WP	Androgen receptor signaling pathway	WP:WP138	0.000110015	3.95855	90	238	14			WP	Brain-Derived Neurotrophic Factor (BDNF) signaling pathway	WP:WP2380	1.52991e-14	13.8153	144	190	27
WP	IL-10 Anti-inflammatory Signaling Pathway	WP:WP4495	0.000115342	3.93801	12	238	6			WP	Chemokine signaling pathway	WP:WP3929	6.04951e-14	13.2183	165	190	28
WP	TGF-beta Signaling Pathway	WP:WP366	0.000125554	3.90117	133	238	17			WP	VEGFA-VEGFR2 Signaling Pathway	WP:WP3888	8.22088e-14	13.0851	437	190	44
WP	Vitamin D Receptor Pathway	WP:WP2877	0.000155085	3.80943	182	238	20			WP	Spinal Cord Injury	WP:WP2431	1.25379e-13	12.9018	118	190	24
WP	Simplified Depiction of MYD88 Distinct Input-Output Pathway	WP:WP3877	0.000163752	3.78581	19	238	7			WP	Oncostatin M Signaling Pathway	WP:WP2374	1.49097e-13	12.8265	66	190	19
WP	Human Thyroid Stimulating Hormone (TSH) signaling pathway	WP:WP2032	0.000175141	3.75661	68	238	12			WP	Senescence and Autophagy in Cancer	WP:WP615	1.78667e-13	12.748	108	190	23
WP	Melanoma	WP:WP4685	0.000175141	3.75661	68	238	12			WP	Kit receptor signaling pathway	WP:WP304	3.88942e-13	12.4101	60	190	18
WP	Follicle Stimulating Hormone (FSH) signaling pathway	WP:WP2035	0.000181454	3.74123	27	238	8			WP	Netrin-UNC5B signaling Pathway	WP:WP4747	4.68177e-13	12.3296	52	190	17
WP	Neuroinflammation	WP:WP4919	0.000208585	3.68072	13	238	6			WP	T-Cell antigen Receptor (TCR) Signaling Pathway	WP:WP69	5.94158e-13	12.2261	91	190	21
WP	Prion disease pathway	WP:WP3995	0.000240474	3.61893	37	238	9			WP	IL-7 Signaling Pathway	WP:WP205	6.27486e-13	12.2024	25	190	13
WP	Overview of interferons-mediated signaling pathway	WP:WP4558	0.000240474	3.61893	37	238	9			WP	Endometrial cancer	WP:WP4155	1.01926e-12	11.9917	63	190	18
WP	DNA Damage Response (only ATM dependent)	WP:WP710	0.000394007	3.4045	114	238	15			WP	Hepatitis C and Hepatocellular Carcinoma	WP:WP3646	4.6493e-12	11.3326	50	190	16
WP	Novel intracellular components of RIG-I-like receptor (RLR) pathway	WP:WP3865	0.000397458	3.40071	61	238	11			WP	IL-2 Signaling Pathway	WP:WP49	4.68189e-12	11.3296	42	190	15
WP	Structural Pathway of Interleukin 1 (IL-1)	WP:WP2637	0.000429549	3.36699	50	238	10			WP	Fibrin Complement Receptor 3 Signaling Pathway	WP:WP4136	4.68189e-12	11.3296	42	190	15
WP	TLR4 Signaling and Tolerance	WP:WP3851	0.000440761	3.3558	30	238	8			WP	Integrated Breast Cancer Pathway	WP:WP1984	7.56713e-12	11.1211	154	190	25
WP	Sudden Infant Death Syndrome (SIDS) Susceptibility Pathways	WP:WP706	0.000470925	3.32705	162	238	18			WP	MAPK Signaling Pathway	WP:WP382	1.04585e-11	10.9805	249	190	31
WP	Neural Crest Cell Migration during Development	WP:WP4564	0.000486681	3.31276	40	238	9			WP	Focal Adhesion	WP:WP306	1.11442e-11	10.953	201	190	28
WP	Kisspeptin/Kisspeptin Receptor System in the Ovary	WP:WP4871	0.000486681	3.31276	40	238	9			WP	T-Cell antigen Receptor (TCR) pathway during Staphylococcus aureus infection	WP:WP3863	1.26705e-11	10.8972	62	190	17
WP	Notch Signaling Pathway Netpath	WP:WP61	0.000553733	3.2567	63	238	11			WP	Non-small cell lung cancer	WP:WP4255	1.33946e-11	10.8731	72	190	18
WP	Cell migration and invasion through p75NTR	WP:WP4561	0.000578078	3.23801	31	238	8			WP	Signaling Pathways in Glioblastoma	WP:WP2261	1.51916e-11	10.8184	83	190	19
WP	Head and Neck Squamous Cell Carcinoma	WP:WP4674	0.000596837	3.22414	76	238	12			WP	Small cell lung cancer	WP:WP4658	3.41135e-11	10.4671	98	190	20
WP	Wnt Signaling Pathway	WP:WP363	0.000750426	3.12469	53	238	10			WP	Development and heterogeneity of the ILC family	WP:WP3893	3.59291e-11	10.4446	32	190	13
WP	ncRNAs involved in STAT3 signaling in hepatocellular carcinoma	WP:WP4337	0.000898817	3.04633	16	238	6			WP	IL-1 signaling pathway	WP:WP195	4.68791e-11	10.329	57	190	16
WP	Host-pathogen interaction of human corona viruses - Interferon induction	WP:WP4880	0.000963405	3.01619	33	238	8			WP	EPO Receptor Signaling	WP:WP581	4.73075e-11	10.3251	26	190	12
WP	White fat cell differentiation	WP:WP4149	0.000963405	3.01619	33	238	8			WP	Breast cancer pathway	WP:WP4262	8.56145e-11	10.0675	156	190	24
WP	Type III interferon signaling	WP:WP2113	0.00105119	2.97832	10	238	5			WP	IL-6 signaling pathway	WP:WP364	1.52537e-10	9.81662	43	190	14
WP	Association Between Physico-Chemical Features and Toxicity Associated Pathways	WP:WP3680	0.00119972	2.92092	68	238	11			WP	EGF/EGFR Signaling Pathway	WP:WP437	2.29592e-10	9.63904	163	190	24
WP	Signaling of Hepatocyte Growth Factor Receptor	WP:WP313	0.00122595	2.91153	34	238	8			WP	B Cell Receptor Signaling Pathway	WP:WP23	3.70798e-10	9.43086	98	190	19
WP	Small cell lung cancer	WP:WP4658	0.00171231	2.76642	98	238	13			WP	DNA Damage Response (only ATM dependent)	WP:WP710	6.75931e-10	9.1701	114	190	20
WP	TGF-B Signaling in Thyroid Cells for Epithelial-Mesenchymal Transition	WP:WP3859	0.00197591	2.70423	18	238	6			WP	Androgen receptor signaling pathway	WP:WP138	8.25745e-10	9.08315	90	190	18
WP	Pathways in clear cell renal cell carcinoma	WP:WP4018	0.00251116	2.60013	87	238	12			WP	IL-9 Signaling Pathway	WP:WP22	8.9482e-10	9.04826	19	190	10
WP	Regulation of Microtubule Cytoskeleton	WP:WP2038	0.00285537	2.54434	49	238	9			WP	Relationship between inflammation, COX-2 and EGFR	WP:WP4483	9.21538e-10	9.03549	25	190	11
WP	Endometrial cancer	WP:WP4155	0.00373077	2.4282	63	238	10			WP	Human Thyroid Stimulating Hormone (TSH) signaling pathway	WP:WP2032	9.3421e-10	9.02956	68	190	16
WP	Synaptic signaling pathways associated with autism spectrum disorder	WP:WP4539	0.00400247	2.39767	51	238	9			WP	SARS-CoV-2 Innate Immunity Evasion and Cell-specific immune response	WP:WP5039	9.3421e-10	9.02956	68	190	16
WP	mBDNF and proBDNF regulation of GABA neurotransmission	WP:WP4829	0.00440993	2.35557	40	238	8			WP	TGF-beta Receptor Signaling	WP:WP560	9.92775e-10	9.00315	58	190	15
WP	Breast cancer pathway	WP:WP4262	0.00467935	2.32981	156	238	16			WP	MET in type 1 papillary renal cell carcinoma	WP:WP4205	9.92775e-10	9.00315	58	190	15
WP	Extracellular vesicle-mediated signaling in recipient cells	WP:WP2870	0.00491815	2.3082	30	238	7			WP	Insulin Signaling	WP:WP481	1.32256e-09	8.87859	161	190	23
WP	Osteopontin Signaling	WP:WP1434	0.00496682	2.30392	13	238	5			WP	Resistin as a regulator of inflammation	WP:WP4481	1.49e-09	8.82681	33	190	12
WP	Activation of NLRP3 Inflammasome by SARS-CoV-2	WP:WP4876	0.00498128	2.30266	7	238	4			WP	Photodynamic therapy-induced AP-1 survival signaling.	WP:WP3611	2.1095e-09	8.67582	51	190	14
WP	Nucleotide-binding Oligomerization Domain (NOD) pathway	WP:WP1433	0.00533194	2.27312	41	238	8			WP	COVID-19 Adverse Outcome Pathway	WP:WP4891	2.16179e-09	8.66519	15	190	9
WP	Vitamin B12 Metabolism	WP:WP1533	0.00551893	2.25815	53	238	9			WP	TGF-beta Receptor Signalling in Skeletal Dysplasias	WP:WP4816	2.84328e-09	8.54618	62	190	15
WP	Type II diabetes mellitus	WP:WP1584	0.00714292	2.14612	22	238	6			WP	Chromosomal and microsatellite instability in colorectal cancer	WP:WP4216	3.7472e-09	8.42629	74	190	16
WP	GPCRs, Class A Rhodopsin-like	WP:WP455	0.00779435	2.10822	255	238	21			WP	PDGFR-beta pathway	WP:WP3972	6.55135e-09	8.18367	29	190	11
WP	Estrogen signaling pathway	WP:WP712	0.00941154	2.02634	23	238	6			WP	TLR4 Signaling and Tolerance	WP:WP3851	1.01196e-08	7.99484	30	190	11
WP	Inflammatory Response Pathway	WP:WP453	0.00952069	2.02133	33	238	7			WP	Estrogen signaling pathway	WP:WP712	1.01529e-08	7.99341	23	190	10
WP	NAD Metabolism in Oncogene-Induced Senescence and Mitochondrial Dysfunction-Associated Senescence	WP:WP5046	0.0122211	1.91289	24	238	6			WP	ESC Pluripotency Pathways	WP:WP3931	1.13987e-08	7.94315	118	190	19
WP	Folate Metabolism	WP:WP176	0.0137638	1.86126	73	238	10			WP	Melanoma	WP:WP4685	1.18785e-08	7.92524	68	190	15
WP	Osteoblast differentiation	WP:WP4787	0.0138444	1.85873	119	238	13			WP	EBV LMP1 signaling	WP:WP262	1.70282e-08	7.76883	24	190	10
WP	Integrated Breast Cancer Pathway	WP:WP1984	0.0151303	1.82015	154	238	15			WP	Angiogenesis	WP:WP1539	1.70282e-08	7.76883	24	190	10
WP	The Overlap Between Signal Transduction Pathways that Contribute to a Range of LMNA Laminopathies	WP:WP4879	0.0151964	1.81826	60	238	9			WP	Non-genomic actions of 1,25 dihydroxyvitamin D3	WP:WP4341	1.84855e-08	7.73317	70	190	15
WP	Cytosolic DNA-sensing pathway	WP:WP4655	0.0154818	1.81018	74	238	10			WP	Hypothesized Pathways in Pathogenesis of Cardiovascular Disease	WP:WP3668	2.77659e-08	7.55649	25	190	10
WP	Physiological and Pathological Hypertrophy of the Heart	WP:WP1528	0.0156608	1.80518	25	238	6			WP	Novel intracellular components of RIG-I-like receptor (RLR) pathway	WP:WP3865	2.94764e-08	7.53053	61	190	14
WP	Role of Altered Glycolysation of MUC1 in Tumour Microenvironment	WP:WP4480	0.0170582	1.76807	9	238	4			WP	Somatroph axis (GH) and its relationship to dietary restriction and aging	WP:WP4186	3.46395e-08	7.46043	6	190	6
WP	Differentiation Pathway	WP:WP2848	0.0174096	1.75921	48	238	8			WP	Cytokines and Inflammatory Response	WP:WP530	4.4143e-08	7.35514	26	190	10
WP	Aryl Hydrocarbon Receptor Netpath	WP:WP2586	0.0174096	1.75921	48	238	8			WP	miRNAs involvement in the immune response in sepsis	WP:WP4329	4.68426e-08	7.32936	63	190	14
WP	Serotonin Receptor 2 and STAT3 Signaling	WP:WP733	0.019281	1.71487	4	238	3			WP	Signaling of Hepatocyte Growth Factor Receptor	WP:WP313	4.85438e-08	7.31387	34	190	11
WP	Selenium Micronutrient Network	WP:WP15	0.019569	1.70843	91	238	11			WP	Allograft Rejection	WP:WP2328	5.92749e-08	7.22713	88	190	16
WP	Initiation of transcription and translation elongation at the HIV-1 LTR	WP:WP3414	0.0206077	1.68597	37	238	7			WP	Head and Neck Squamous Cell Carcinoma	WP:WP4674	6.37758e-08	7.19534	76	190	15
WP	Factors and pathways affecting insulin-like growth factor (IGF1)-Akt signaling	WP:WP3850	0.0206077	1.68597	37	238	7			WP	Alpha 6 Beta 4 signaling pathway	WP:WP244	6.92562e-08	7.15954	35	190	11
WP	Amplification and Expansion of Oncogenic Pathways as Metastatic Traits	WP:WP3678	0.0215338	1.66688	17	238	5			WP	Epithelial to mesenchymal transition in colorectal cancer	WP:WP4239	9.14168e-08	7.03897	164	190	21
WP	Canonical and Non-Canonical TGF-B signaling	WP:WP3874	0.0215338	1.66688	17	238	5			WP	Neovascularisation processes	WP:WP4331	1.35827e-07	6.86701	37	190	11
WP	MAP3K1 role in promoting and blocking gonadal determination	WP:WP4872	0.0215338	1.66688	17	238	5			WP	Factors and pathways affecting insulin-like growth factor (IGF1)-Akt signaling	WP:WP3850	1.35827e-07	6.86701	37	190	11
WP	Airway smooth muscle cell contraction	WP:WP4962	0.0215338	1.66688	17	238	5			WP	Nanoparticle-mediated activation of receptor signaling	WP:WP2643	1.55883e-07	6.8072	29	190	10
WP	Leptin Insulin Overlap	WP:WP3935	0.0215338	1.66688	17	238	5			WP	Selective expression of chemokine receptors during T-cell polarization	WP:WP4494	1.55883e-07	6.8072	29	190	10
WP	ACE Inhibitor Pathway	WP:WP554	0.0215338	1.66688	17	238	5			WP	TNF alpha Signaling Pathway	WP:WP231	1.64658e-07	6.78342	94	190	16
WP	Mammary gland development pathway - Involution (Stage 4 of 4)	WP:WP2815	0.0277295	1.55706	10	238	4			WP	Vitamin D in inflammatory diseases	WP:WP4482	1.84464e-07	6.73409	22	190	9
WP	MFAP5 effect on permeability and motility of endothelial cells via cytoskeleton rearrangement	WP:WP4560	0.029056	1.53676	18	238	5			WP	miRNA regulation of prostate cancer signaling pathways	WP:WP3981	2.31034e-07	6.63632	59	190	13
WP	Cardiac Progenitor Differentiation	WP:WP2406	0.0357056	1.44726	53	238	8			WP	PDGF Pathway	WP:WP2526	3.4386e-07	6.46362	40	190	11
WP	Cannabinoid receptor signaling	WP:WP3869	0.0377954	1.42256	29	238	6			WP	Interactions between immune cells and microRNAs in tumor microenvironment	WP:WP4559	3.4386e-07	6.46362	40	190	11
WP	Eicosanoid metabolism via Lipo Oxygenases (LOX)	WP:WP4721	0.0377954	1.42256	29	238	6			WP	Structural Pathway of Interleukin 1 (IL-1)	WP:WP2637	3.50774e-07	6.45497	50	190	12
WP	Overview of nanoparticle effects	WP:WP3287	0.0384288	1.41534	19	238	5			WP	Regulation of Actin Cytoskeleton	WP:WP51	6.77702e-07	6.16896	149	190	19
WP	Bladder Cancer	WP:WP2828	0.0404245	1.39336	41	238	7			WP	TGF-B Signaling in Thyroid Cells for Epithelial-Mesenchymal Transition	WP:WP3859	7.20144e-07	6.14258	18	190	8
WP	Human Complement System	WP:WP2806	0.0417722	1.37911	99	238	11			WP	4-hydroxytamoxifen, Dexamethasone, and Retinoic Acids Regulation of p27 Expression	WP:WP3879	7.20144e-07	6.14258	18	190	8
WP	Interleukin-1 Induced Activation of NF-kappa-B	WP:WP3656	0.0425019	1.37159	11	238	4			WP	Ras Signaling	WP:WP4223	7.69459e-07	6.11381	184	190	21
WP	Hypertrophy Model	WP:WP516	0.0499342	1.3016	20	238	5			WP	Corticotropin-releasing hormone signaling pathway	WP:WP2355	8.8476e-07	6.05317	91	190	15
										WP	Osteopontin Signaling	WP:WP1434	1.27299e-06	5.89517	13	190	7
										WP	Association Between Physico-Chemical Features and Toxicity Associated Pathways	WP:WP3680	1.46879e-06	5.83304	68	190	13
										WP	Follicle Stimulating Hormone (FSH) signaling pathway	WP:WP2035	1.55883e-06	5.8072	27	190	9
										WP	LTF danger signal response pathway	WP:WP4478	1.98544e-06	5.70214	20	190	8
										WP	Translation inhibitors in chronically activated PDGFRA cells	WP:WP4566	2.81983e-06	5.54978	48	190	11
										WP	Aryl Hydrocarbon Receptor Netpath	WP:WP2586	2.81983e-06	5.54978	48	190	11
										WP	Adipogenesis	WP:WP236	3.52035e-06	5.45341	131	190	17
										WP	Type I Interferon Induction and Signaling During SARS-CoV-2 Infection	WP:WP4868	3.9758e-06	5.40058	39	190	10
										WP	Extracellular vesicle-mediated signaling in recipient cells	WP:WP2870	4.45786e-06	5.35087	30	190	9
										WP	Neural Crest Cell Migration during Development	WP:WP4564	5.18645e-06	5.28513	40	190	10
										WP	Synaptic signaling pathways associated with autism spectrum disorder	WP:WP4539	5.56512e-06	5.25453	51	190	11
										WP	Toll-like Receptor Signaling related to MyD88	WP:WP3858	8.36749e-06	5.0774	32	190	9
										WP	Wnt Signaling Pathway	WP:WP363	8.52457e-06	5.06933	53	190	11
										WP	Apoptosis-related network due to altered Notch3 in ovarian cancer	WP:WP2864	1.04731e-05	4.97993	54	190	11
										WP	Neural Crest Cell Migration in Cancer	WP:WP4565	1.09868e-05	4.95913	43	190	10
										WP	Interferon type I signaling pathways	WP:WP585	1.28074e-05	4.89254	55	190	11
										WP	Platelet-mediated interactions with vascular and circulating cells	WP:WP4462	1.32444e-05	4.87797	17	190	7
										WP	Cells and Molecules involved in local acute inflammatory response	WP:WP4493	1.32444e-05	4.87797	17	190	7
										WP	IL1 and megakaryocytes in obesity	WP:WP2865	1.53019e-05	4.81526	25	190	8
										WP	Integrated Cancer Pathway	WP:WP1971	1.74989e-05	4.75699	45	190	10
										WP	Signal transduction through IL1R	WP:WP4496	1.97334e-05	4.7048	35	190	9
										WP	Angiopoietin Like Protein 8 Regulatory Pathway	WP:WP3915	2.44759e-05	4.61126	132	190	16
										WP	CAMKK2 Pathway	WP:WP4874	2.57454e-05	4.5893	36	190	9
										WP	Apoptosis	WP:WP254	2.74228e-05	4.56189	86	190	13
										WP	FGFR3 signalling in chondrocyte proliferation and terminal differentiation	WP:WP4767	3.0082e-05	4.52169	27	190	8
										WP	Extracellular vesicles in the crosstalk of cardiac cells	WP:WP4300	3.0082e-05	4.52169	27	190	8
										WP	Overview of nanoparticle effects	WP:WP3287	3.28795e-05	4.48308	19	190	7
										WP	Hippo-Merlin Signaling Dysregulation	WP:WP4541	5.01815e-05	4.29946	122	190	15
										WP	Notch Signaling Pathway Netpath	WP:WP61	5.53107e-05	4.25719	63	190	11
										WP	Nonalcoholic fatty liver disease	WP:WP4396	6.2376e-05	4.20498	159	190	17
										WP	Kisspeptin/Kisspeptin Receptor System in the Ovary	WP:WP4871	6.85518e-05	4.16398	40	190	9
										WP	PI3K-AKT-mTOR signaling pathway and therapeutic opportunities	WP:WP3844	7.43362e-05	4.1288	30	190	8
										WP	Endochondral Ossification	WP:WP474	7.69483e-05	4.1138	65	190	11
										WP	Endochondral Ossification with Skeletal Dysplasias	WP:WP4808	7.69483e-05	4.1138	65	190	11
										WP	Cell migration and invasion through p75NTR	WP:WP4561	9.80544e-05	4.00853	31	190	8
										WP	Ebola Virus Pathway on Host	WP:WP4217	0.000115526	3.93732	130	190	15
										WP	FOXP3 in COVID-19	WP:WP5063	0.00014343	3.84336	15	190	6
										WP	Pathways Regulating Hippo Signaling	WP:WP4540	0.000146423	3.83439	99	190	13
										WP	Role of Altered Glycolysation of MUC1 in Tumour Microenvironment	WP:WP4480	0.000164188	3.78466	9	190	5
										WP	Regucalcin in proximal tubule epithelial kidney cells	WP:WP4838	0.000165292	3.78175	33	190	8
										WP	Host-pathogen interaction of human corona viruses - Interferon induction	WP:WP4880	0.000165292	3.78175	33	190	8
										WP	p38 MAPK Signaling Pathway	WP:WP400	0.000211541	3.67461	34	190	8
										WP	Pathways in clear cell renal cell carcinoma	WP:WP4018	0.000227286	3.64343	87	190	12
										WP	Envelope proteins and their potential roles in EDMD physiopathology	WP:WP4535	0.000242459	3.61536	46	190	9
										WP	TCA Cycle Nutrient Utilization and Invasiveness of Ovarian Cancer	WP:WP2868	0.000281824	3.55002	5	190	4
										WP	Mammary gland development pathway - Embryonic development (Stage 1 of 4)	WP:WP2813	0.00049948	3.30148	18	190	6
										WP	RAS and Bradykinin pathways in COVID-19	WP:WP4969	0.00082276	3.08473	29	190	7
										WP	MAPK and NFkB Signalling Pathways Inhibited by Yersinia YopJ	WP:WP3849	0.000970302	3.01309	12	190	5
										WP	Osteoblast differentiation	WP:WP4787	0.00119069	2.9242	119	190	13
										WP	Genes controlling nephrogenesis	WP:WP4823	0.00139183	2.85641	43	190	8
										WP	Mammary gland development pathway - Puberty (Stage 2 of 4)	WP:WP2814	0.00154469	2.81116	13	190	5
										WP	Control of immune tolerance by vasoactive intestinal peptide	WP:WP4484	0.00154469	2.81116	13	190	5
										WP	Sudden Infant Death Syndrome (SIDS) Susceptibility Pathways	WP:WP706	0.00183798	2.73566	162	190	15
										WP	PI3K/AKT/mTOR - VitD3 Signalling	WP:WP4141	0.00184582	2.73381	22	190	6
										WP	Hair Follicle Development: Organogenesis - Part 2 of 3	WP:WP2839	0.00206808	2.68443	33	190	7
										WP	Cytosolic DNA-sensing pathway	WP:WP4655	0.00209302	2.67923	74	190	10
										WP	The Overlap Between Signal Transduction Pathways that Contribute to a Range of LMNA Laminopathies	WP:WP4879	0.00240147	2.61952	60	190	9
										WP	Energy Metabolism	WP:WP1541	0.00325262	2.48777	48	190	8
										WP	Differentiation Pathway	WP:WP2848	0.00325262	2.48777	48	190	8
										WP	Thyroid hormones production and their peripheral downstream signalling effects	WP:WP4746	0.00348111	2.45828	95	190	11
										WP	Regulatory circuits of the STAT3 signaling pathway	WP:WP4538	0.00376425	2.42432	79	190	10
										WP	Host-pathogen interaction of human corona viruses - MAPK signaling	WP:WP4877	0.00379118	2.42123	36	190	7
										WP	Regulation of Microtubule Cytoskeleton	WP:WP2038	0.00380462	2.41969	49	190	8
										WP	Type II interferon signaling (IFNG)	WP:WP619	0.0045774	2.33938	37	190	7
										WP	Prion disease pathway	WP:WP3995	0.0045774	2.33938	37	190	7
										WP	ncRNAs involved in STAT3 signaling in hepatocellular carcinoma	WP:WP4337	0.00492958	2.30719	16	190	5
										WP	ApoE and miR-146 in inflammation and atherosclerosis	WP:WP3926	0.00655994	2.1831	9	190	4
										WP	Supression of HMGB1 mediated inflammation by THBD	WP:WP4479	0.00655994	2.1831	9	190	4
										WP	NLR Proteins	WP:WP288	0.00655994	2.1831	9	190	4
										WP	Amplification and Expansion of Oncogenic Pathways as Metastatic Traits	WP:WP3678	0.00684189	2.16482	17	190	5
										WP	Canonical and Non-Canonical TGF-B signaling	WP:WP3874	0.00684189	2.16482	17	190	5
										WP	Cardiac Progenitor Differentiation	WP:WP2406	0.00686166	2.16357	53	190	8
										WP	Vitamin B12 Metabolism	WP:WP1533	0.00686166	2.16357	53	190	8
										WP	Nuclear Receptors Meta-Pathway	WP:WP2882	0.00757334	2.12071	321	190	21
										WP	Fragile X Syndrome	WP:WP4549	0.00771834	2.11248	122	190	12
										WP	Microglia Pathogen Phagocytosis Pathway	WP:WP3937	0.00777694	2.10919	40	190	7
										WP	Serotonin Receptor 2 and STAT3 Signaling	WP:WP733	0.00912416	2.03981	4	190	3
										WP	T-Cell Receptor and Co-stimulatory Signaling	WP:WP2583	0.0101482	1.99361	29	190	6
										WP	Mammary gland development pathway - Involution (Stage 4 of 4)	WP:WP2815	0.0107188	1.96985	10	190	4
										WP	Serotonin Receptor 4/6/7 and NR3C Signaling	WP:WP734	0.0123407	1.90866	19	190	5
										WP	Matrix Metalloproteinases	WP:WP129	0.0124226	1.90579	30	190	6
										WP	Hypertrophy Model	WP:WP516	0.016121	1.79261	20	190	5
										WP	Serotonin Receptor 2 and ELK-SRF/GATA4 signaling	WP:WP732	0.016121	1.79261	20	190	5
										WP	Heart Development	WP:WP1591	0.0196571	1.70648	46	190	7
										WP	Galanin receptor pathway	WP:WP4970	0.0207304	1.68339	21	190	5
										WP	Imatinib and Chronic Myeloid Leukemia	WP:WP3640	0.0207304	1.68339	21	190	5
										WP	White fat cell differentiation	WP:WP4149	0.0217632	1.66228	33	190	6
										WP	Mammary gland development pathway - Pregnancy and lactation (Stage 3 of 4)	WP:WP2817	0.0217632	1.66228	33	190	6
										WP	Inflammatory Response Pathway	WP:WP453	0.0217632	1.66228	33	190	6
										WP	BDNF-TrkB Signaling	WP:WP3676	0.0217632	1.66228	33	190	6
										WP	IL-10 Anti-inflammatory Signaling Pathway	WP:WP4495	0.0242853	1.61466	12	190	4
										WP	Nanoparticle triggered regulated necrosis	WP:WP2513	0.0242853	1.61466	12	190	4
										WP	Aryl Hydrocarbon Receptor Pathway	WP:WP2873	0.0259177	1.5864	48	190	7
										WP	Neuroinflammation	WP:WP4919	0.0343923	1.46354	13	190	4
										WP	Overview of leukocyte-intrinsic Hippo pathway functions	WP:WP4542	0.0359493	1.44431	36	190	6
										WP	Type 2 papillary renal cell carcinoma	WP:WP4241	0.0359493	1.44431	36	190	6
										WP	NAD Metabolism in Oncogene-Induced Senescence and Mitochondrial Dysfunction-Associated Senescence	WP:WP5046	0.040726	1.39013	24	190	5
										WP	Photodynamic therapy-induced HIF-1 survival signaling	WP:WP3614	0.0420212	1.37653	37	190	6
										WP	Robo4 and VEGF Signaling Pathways Crosstalk	WP:WP3943	0.0439465	1.35708	6	190	3
										WP	Cancer immunotherapy by CTLA4 blockade	WP:WP4582	0.0472076	1.32599	14	190	4
										WP	Amyotrophic lateral sclerosis (ALS)	WP:WP2447	0.0488703	1.31096	38	190	6
										WP	Physiological and Pathological Hypertrophy of the Heart	WP:WP1528	0.049879	1.30208	25	190	5
